# Supplementary material for: Global mapping of binding sites for phic31 integrase in transgenic maden-darby bovine kidney cells using ChIP-seq
Source: Hereditas. 2019 Jan 14;156:3. doi: 10.1186/s41065-018-0079-z (PMC6332687; doi:10.1186/s41065-018-0079-z)
Supplement: Supplementary file 4 — KEGG functional analysis output file. (XLSX 855 kb) [file 41065_2018_79_MOESM4_ESM.xlsx]

## Sheet: Sheet1
Peak	repeat-region	repeat-type	repeat-Location	distance
1:427743-428465	1:428415-428486	SINE/tRNA-Core-RTE	overlap	NA
1:427743-428465	1:427299-427421	SINE/MIR	up	-322
1:427743-428465	1:428492-428661	LINE/L1	down	27
1:773293-773790	1:773447-773824	LINE/L1	overlap	NA
1:773293-773790	1:773083-773194	SINE/tRNA-Core-RTE	up	-99
1:773293-773790	1:774229-774480	LINE/L1	down	439
1:1534571-1534883	1:1534800-1534914	LINE/L2	overlap	NA
1:1534571-1534883	1:1534249-1534369	SINE/tRNA	up	-202
1:1534571-1534883	1:1534917-1535203	LINE/L1	down	34
1:1833741-1834170	1:1834082-1834162	DNA/hAT-Ac	overlap	NA
1:1833741-1834170	1:1833345-1833470	DNA/hAT-Charlie	up	-271
1:1833741-1834170	1:1834441-1834489	Low_complexity	down	271
1:1891534-1891912	1:1891443-1891848	LINE/L1	overlap	NA
1:1891534-1891912	1:1891849-1891902	LTR/ERVK	overlap	NA
1:1891534-1891912	1:1891903-1891942	LINE/L1	overlap	NA
1:1891534-1891912	1:1890933-1891279	LINE/L1	up	-255
1:1891534-1891912	1:1892676-1892784	DNA/hAT-Tip100	down	764
1:1921519-1921771	1:1921413-1921834	LTR/ERVL-MaLR	overlap	NA
1:1921519-1921771	1:1921206-1921412	SINE/tRNA-Core-RTE	up	-107
1:1921519-1921771	1:1922636-1922671	DNA/hAT-Charlie	down	865
1:2283826-2284327	1:2283811-2284242	LINE/L1	overlap	NA
1:2283826-2284327	1:2284262-2284341	DNA/hAT-Tip100	overlap	NA
1:2283826-2284327	1:2283753-2283784	Simple_repeat	up	-42
1:2283826-2284327	1:2284435-2284577	LINE/L2	down	108
1:2381938-2382319	1:2381907-2381975	SINE/MIR	overlap	NA
1:2381938-2382319	1:2382146-2382211	SINE/tRNA-Core-RTE	overlap	NA
1:2381938-2382319	1:2382214-2382314	LINE/RTE-BovB	overlap	NA
1:2381938-2382319	1:2380872-2381282	LINE/L1	up	-656
1:2381938-2382319	1:2383356-2383525	SINE/tRNA-Core-RTE	down	1037
1:2418988-2419325	1:2418810-2419012	SINE/tRNA-Core-RTE	overlap	NA
1:2418988-2419325	1:2417754-2417998	SINE/MIR	up	-990
1:2418988-2419325	1:2420628-2420850	SINE/MIR	down	1303
1:2551190-2551512	1:2551169-2551516	LINE/L1	overlap	NA
1:2551190-2551512	1:2550995-2551113	SINE/tRNA	up	-77
1:2551190-2551512	1:2551517-2551556	Simple_repeat	down	5
1:2636647-2637020	1:2636382-2636692	SINE/tRNA	overlap	NA
1:2636647-2637020	1:2635450-2635711	DNA/TcMar-Tigger	up	-936
1:2636647-2637020	1:2637120-2637321	SINE/tRNA-Core-RTE	down	100
1:2642631-2642898	1:2642465-2642872	LTR/ERVL-MaLR	overlap	NA
1:2642631-2642898	1:2641767-2642368	LINE/RTE-BovB	up	-263
1:2642631-2642898	1:2643097-2643283	SINE/tRNA-Core-RTE	down	199
1:2738848-2739261	1:2738757-2738823	SINE/tRNA-Core-RTE	up	-25
1:2738848-2739261	1:2739527-2739671	LINE/L2	down	266
1:3057991-3058275	1:3058271-3058367	DNA/hAT-Tip100	overlap	NA
1:3057991-3058275	1:3057861-3057882	Simple_repeat	up	-109
1:3057991-3058275	1:3058404-3058616	DNA/hAT-Tip100	down	129
1:4476829-4477186	1:4476829-4476982	Simple_repeat	overlap	NA
1:4476829-4477186	1:4474501-4476376	LINE/L1	up	-453
1:4476829-4477186	1:4477721-4478092	LINE/L1	down	535
1:5233168-5234671	1:5233206-5235900	Satellite/centr	overlap	NA
1:5233168-5234671	1:5232757-5233105	LINE/L1	up	-63
1:5233168-5234671	1:5236001-5238511	Satellite/centr	down	1330
1:5235012-5238458	1:5233206-5235900	Satellite/centr	overlap	NA
1:5235012-5238458	1:5236001-5238511	Satellite/centr	overlap	NA
1:5235012-5238458	1:5232757-5233105	LINE/L1	up	-1907
1:5235012-5238458	1:5238612-5241421	Satellite/centr	down	154
1:5252593-5253742	1:5251438-5253627	Satellite/centr	overlap	NA
1:5252593-5253742	1:5253728-5255695	Satellite/centr	overlap	NA
1:5252593-5253742	1:5249316-5251335	Satellite/centr	up	-1258
1:5252593-5253742	1:5255796-5257610	Satellite/centr	down	2054
1:5256936-5259698	1:5255796-5257610	Satellite/centr	overlap	NA
1:5256936-5259698	1:5257711-5259780	Satellite/centr	overlap	NA
1:5256936-5259698	1:5253728-5255695	Satellite/centr	up	-1241
1:5256936-5259698	1:5259884-5261896	Satellite/centr	down	186
1:5259938-5261810	1:5259884-5261896	Satellite/centr	overlap	NA
1:5259938-5261810	1:5257711-5259780	Satellite/centr	up	-158
1:5259938-5261810	1:5261997-5263902	Satellite/centr	down	187
1:5262962-5265131	1:5261997-5263902	Satellite/centr	overlap	NA
1:5262962-5265131	1:5264008-5265254	Satellite/centr	overlap	NA
1:5262962-5265131	1:5259884-5261896	Satellite/centr	up	-1066
1:5262962-5265131	1:5265355-5268715	Satellite/centr	down	224
1:5265262-5266707	1:5265355-5268715	Satellite/centr	overlap	NA
1:5265262-5266707	1:5264008-5265254	Satellite/centr	up	-8
1:5265262-5266707	1:5268820-5270603	Satellite/centr	down	2113
1:5278413-5280157	1:5278355-5280297	Satellite/centr	overlap	NA
1:5278413-5280157	1:5276688-5278254	Satellite/centr	up	-159
1:5278413-5280157	1:5280399-5281506	Satellite/centr	down	242
1:5284336-5285211	1:5283098-5285216	Satellite/centr	overlap	NA
1:5284336-5285211	1:5281607-5282997	Satellite/centr	up	-1339
1:5284336-5285211	1:5285318-5286857	Satellite/centr	down	107
1:5285430-5286378	1:5285318-5286857	Satellite/centr	overlap	NA
1:5285430-5286378	1:5283098-5285216	Satellite/centr	up	-214
1:5285430-5286378	1:5286958-5288993	Satellite/centr	down	580
1:5290616-5292341	1:5289094-5292509	Satellite/centr	overlap	NA
1:5290616-5292341	1:5286958-5288993	Satellite/centr	up	-1623
1:5290616-5292341	1:5292610-5293135	LINE/L1	down	269
1:5304671-5305721	1:5304654-5307131	Satellite/centr	overlap	NA
1:5304671-5305721	1:5302333-5302490	LINE/L1	up	-2181
1:5304671-5305721	1:5307356-5307545	SINE/tRNA-Core-RTE	down	1635
1:5858169-5858426	1:5857819-5858538	LTR/ERV1	overlap	NA
1:5858169-5858426	1:5857604-5857818	SINE/tRNA-Core-RTE	up	-351
1:5858169-5858426	1:5858668-5858873	SINE/tRNA-Core-RTE	down	242
1:5954185-5954584	1:5954030-5954528	LTR/ERVL	overlap	NA
1:5954185-5954584	1:5954531-5954732	SINE/tRNA-Core-RTE	overlap	NA
1:5954185-5954584	1:5953758-5953970	SINE/tRNA-Core-RTE	up	-215
1:5954185-5954584	1:5954839-5955043	LTR/ERVL-MaLR	down	255
1:6269249-6269584	1:6268998-6269069	SINE/MIR	up	-180
1:6269249-6269584	1:6269957-6270155	SINE/tRNA-Core-RTE	down	373
1:6810097-6810432	1:6809896-6810103	DNA/hAT-Tip100	overlap	NA
1:6810097-6810432	1:6809377-6809849	LTR/ERV1	up	-248
1:6810097-6810432	1:6811478-6811665	SINE/tRNA	down	1046
1:7956920-7957607	1:7957570-7957803	SINE/MIR	overlap	NA
1:7956920-7957607	1:7956823-7956901	SINE/MIR	up	-19
1:7956920-7957607	1:7957807-7957920	SINE/Core-RTE	down	200
1:9894820-9895152	1:9893865-9893887	Simple_repeat	up	-933
1:9894820-9895152	1:9895607-9895707	LINE/L1	down	455
1:10449459-10449786	1:10449434-10449672	LTR/ERVL	overlap	NA
1:10449459-10449786	1:10449673-10449860	SINE/tRNA-Core-RTE	overlap	NA
1:10449459-10449786	1:10449089-10449287	SINE/tRNA-Core-RTE	up	-172
1:10449459-10449786	1:10449861-10449915	LTR/ERVL	down	75
1:11269707-11272136	1:11269656-11269909	Satellite/centr	overlap	NA
1:11269707-11272136	1:11269910-11270578	Satellite/centr	overlap	NA
1:11269707-11272136	1:11270579-11271240	Satellite/centr	overlap	NA
1:11269707-11272136	1:11271241-11271745	Satellite/centr	overlap	NA
1:11269707-11272136	1:11271846-11273338	Satellite/centr	overlap	NA
1:11269707-11272136	1:11269354-11269555	LINE/L1	up	-152
1:11269707-11272136	1:11273459-11274076	Satellite/centr	down	1323
1:11272504-11274598	1:11271846-11273338	Satellite/centr	overlap	NA
1:11272504-11274598	1:11273459-11274076	Satellite/centr	overlap	NA
1:11272504-11274598	1:11274077-11274748	Satellite/centr	overlap	NA
1:11272504-11274598	1:11271241-11271745	Satellite/centr	up	-759
1:11272504-11274598	1:11274749-11274880	Satellite/centr	down	151
1:11991009-11991849	1:11990388-11991448	LINE/RTE-BovB	overlap	NA
1:11991009-11991849	1:11991449-11991521	SINE/Core-RTE	overlap	NA
1:11991009-11991849	1:11991539-11991824	LTR/ERV1	overlap	NA
1:11991009-11991849	1:11990095-11990188	DNA/hAT-Charlie	up	-821
1:11991009-11991849	1:11991917-11992048	SINE/MIR	down	68
1:13546294-13547358	1:13546339-13547477	Satellite/centr	overlap	NA
1:13546294-13547358	1:13546144-13546238	LINE/L1	up	-56
1:13546294-13547358	1:13547578-13549206	Satellite/centr	down	220
1:13549031-13550485	1:13547578-13549206	Satellite/centr	overlap	NA
1:13549031-13550485	1:13549307-13550515	Satellite/centr	overlap	NA
1:13549031-13550485	1:13546339-13547477	Satellite/centr	up	-1554
1:13549031-13550485	1:13550616-13551978	Satellite/centr	down	131
1:14698645-14699032	1:14698731-14698896	SINE/tRNA-Core-RTE	overlap	NA
1:14698645-14699032	1:14698439-14698495	Simple_repeat	up	-150
1:14698645-14699032	1:14699104-14699169	SINE/tRNA-Core-RTE	down	72
1:21379949-21380491	1:21379681-21379720	Simple_repeat	up	-229
1:21379949-21380491	1:21380926-21380992	SINE/tRNA-Core-RTE	down	435
1:21925882-21926233	1:21925949-21926101	LINE/L2	overlap	NA
1:21925882-21926233	1:21925629-21925776	SINE/tRNA-Core-RTE	up	-106
1:21925882-21926233	1:21927042-21927108	SINE/tRNA-Core-RTE	down	809
1:21931344-21932266	1:21931207-21932209	Satellite/centr	overlap	NA
1:21931344-21932266	1:21931062-21931103	SINE/tRNA-Core-RTE	up	-241
1:21931344-21932266	1:21932520-21932601	SINE/tRNA-Core-RTE	down	254
1:23640021-23640333	1:23639992-23640162	LINE/L2	overlap	NA
1:23640021-23640333	1:23639732-23639937	SINE/tRNA-Core-RTE	up	-84
1:23640021-23640333	1:23640761-23640803	Simple_repeat	down	428
1:23765889-23766213	1:23765885-23765986	SINE/MIR	overlap	NA
1:23765889-23766213	1:23765554-23765688	SINE/MIR	up	-201
1:23765889-23766213	1:23766376-23766645	SINE/Core-RTE	down	163
1:23990165-23990699	1:23990198-23990249	LINE/RTE-BovB	overlap	NA
1:23990165-23990699	1:23990250-23990311	SINE/tRNA-Core-RTE	overlap	NA
1:23990165-23990699	1:23990312-23990336	Simple_repeat	overlap	NA
1:23990165-23990699	1:23990663-23990870	SINE/tRNA-Core-RTE	overlap	NA
1:23990165-23990699	1:23990002-23990105	DNA/hAT-Charlie	up	-60
1:23990165-23990699	1:23991123-23992071	LINE/L1	down	424
1:24261596-24262492	1:24261912-24262304	LTR/Gypsy	overlap	NA
1:24261596-24262492	1:24262410-24262455	SINE/Core-RTE	overlap	NA
1:24261596-24262492	1:24261295-24261338	Simple_repeat	up	-258
1:24261596-24262492	1:24262724-24262841	LINE/CR1	down	232
1:24621479-24621964	1:24621548-24621750	LTR/ERVL-MaLR	overlap	NA
1:24621479-24621964	1:24621758-24621987	SINE/tRNA	overlap	NA
1:24621479-24621964	1:24621216-24621306	LTR/ERVL-MaLR	up	-173
1:24621479-24621964	1:24621994-24622178	LTR/ERVL-MaLR	down	30
1:26113656-26114027	1:26113386-26113631	SINE/MIR	up	-25
1:26113656-26114027	1:26115872-26115900	Simple_repeat	down	1845
1:29318025-29318894	1:29317938-29318587	LTR/ERVK	overlap	NA
1:29318025-29318894	1:29318588-29319854	Satellite/centr	overlap	NA
1:29318025-29318894	1:29316912-29317837	LINE/L1	up	-188
1:29318025-29318894	1:29320088-29320257	SINE/tRNA-Core-RTE	down	1194
1:29319020-29319816	1:29318588-29319854	Satellite/centr	overlap	NA
1:29319020-29319816	1:29317938-29318587	LTR/ERVK	up	-433
1:29319020-29319816	1:29320088-29320257	SINE/tRNA-Core-RTE	down	272
1:32678982-32679636	1:32678649-32681932	LINE/L1	overlap	NA
1:32678982-32679636	1:32678043-32678243	SINE/MIR	up	-739
1:32678982-32679636	1:32681933-32681984	LTR/ERVK	down	2297
1:34922017-34923717	1:34922072-34923851	Satellite/centr	overlap	NA
1:34922017-34923717	1:34921725-34921860	SINE/MIR	up	-157
1:34922017-34923717	1:34924060-34924308	SINE/Core-RTE	down	343
1:35655449-35655776	1:35653192-35653451	SINE/Core-RTE	up	-1998
1:35655449-35655776	1:35658303-35658360	LINE/L2	down	2527
1:37034120-37034679	1:37034450-37034480	Simple_repeat	overlap	NA
1:37034120-37034679	1:37033321-37033518	SINE/tRNA-Core-RTE	up	-602
1:37034120-37034679	1:37034938-37035267	LTR/ERV1	down	259
1:37248212-37248493	1:37248087-37248285	SINE/tRNA-Core-RTE	overlap	NA
1:37248212-37248493	1:37248338-37248459	LINE/L2	overlap	NA
1:37248212-37248493	1:37246998-37247240	SINE/Core-RTE	up	-972
1:37248212-37248493	1:37248722-37248892	DNA/hAT-Charlie	down	229
1:38190759-38191225	1:38190484-38190569	SINE/MIR	up	-190
1:38190759-38191225	1:38191462-38191653	LINE/L1	down	237
1:41034186-41034900	1:41034224-41034583	LTR/ERV1	overlap	NA
1:41034186-41034900	1:41034584-41034855	SINE/Core-RTE	overlap	NA
1:41034186-41034900	1:41034856-41035034	LTR/ERV1	overlap	NA
1:41034186-41034900	1:41032983-41033069	SINE/MIR	up	-1117
1:41034186-41034900	1:41035284-41035323	Simple_repeat	down	384
1:41310957-41311445	1:41310988-41311193	SINE/tRNA-Core-RTE	overlap	NA
1:41310957-41311445	1:41311221-41311399	LINE/L2	overlap	NA
1:41310957-41311445	1:41310849-41310924	Simple_repeat	up	-33
1:41310957-41311445	1:41311702-41311762	LINE/L2	down	257
1:41767282-41767713	1:41766369-41766412	Simple_repeat	up	-870
1:41767282-41767713	1:41767767-41767879	SINE/MIR	down	54
1:43216731-43217162	1:43217041-43217063	Simple_repeat	overlap	NA
1:43216731-43217162	1:43216061-43216193	LINE/L2	up	-538
1:43216731-43217162	1:43218113-43218229	SINE/tRNA-Core-RTE	down	951
1:43988488-43988815	1:43987775-43988146	LTR/ERVL-MaLR	up	-342
1:43988488-43988815	1:43988852-43988865	SINE/tRNA-RTE	down	37
1:45042644-45042985	1:45041433-45042711	LTR/ERVK	overlap	NA
1:45042644-45042985	1:45040931-45041001	LTR/ERV1	up	-1643
1:45042644-45042985	1:45043343-45043454	SINE/tRNA-Core-RTE	down	358
1:45627748-45628309	1:45627070-45627207	SINE/tRNA-Core-RTE	up	-541
1:45627748-45628309	1:45630380-45630586	SINE/tRNA-Core-RTE	down	2071
1:45692782-45693494	1:45692879-45692884	Simple_repeat	overlap	NA
1:45692782-45693494	1:45692885-45692941	Simple_repeat	overlap	NA
1:45692782-45693494	1:45692337-45692494	SINE/MIR	up	-288
1:45692782-45693494	1:45693925-45694015	SINE/MIR	down	431
1:45718443-45718801	1:45717747-45718247	DNA/hAT-Tip100	up	-196
1:45718443-45718801	1:45718977-45719087	SINE/MIR	down	176
1:45729859-45731523	1:45729735-45735081	Satellite/centr	overlap	NA
1:45729859-45731523	1:45726478-45729634	Satellite/centr	up	-225
1:45729859-45731523	1:45735182-45737762	Satellite/centr	down	3659
1:45736830-45737803	1:45735182-45737762	Satellite/centr	overlap	NA
1:45736830-45737803	1:45729735-45735081	Satellite/centr	up	-1749
1:45736830-45737803	1:45737863-45737920	LINE/RTE-BovB	down	60
1:46946574-46947125	1:46944052-46952430	LINE/L1	overlap	NA
1:46946574-46947125	1:46944007-46944056	LINE/L1	up	-2518
1:46946574-46947125	1:46952430-46953003	LINE/L1	down	5305
1:50069560-50069923	1:50069642-50070415	LINE/RTE-BovB	overlap	NA
1:50069560-50069923	1:50069088-50069188	LINE/L1	up	-372
1:50069560-50069923	1:50070416-50070482	SINE/Core-RTE	down	493
1:53183655-53184033	1:53182603-53182911	LINE/L2	up	-744
1:53183655-53184033	1:53184437-53184469	Simple_repeat	down	404
1:53547112-53547664	1:53547093-53547309	LTR/ERVL-MaLR	overlap	NA
1:53547112-53547664	1:53546824-53547092	SINE/Core-RTE	up	-20
1:53547112-53547664	1:53548405-53548706	SINE/tRNA	down	741
1:54713512-54714250	1:54713457-54713526	SINE/tRNA-Core-RTE	overlap	NA
1:54713512-54714250	1:54713528-54713638	LINE/RTE-BovB	overlap	NA
1:54713512-54714250	1:54713671-54713894	SINE/tRNA-Core-RTE	overlap	NA
1:54713512-54714250	1:54713329-54713448	SINE/MIR	up	-64
1:54713512-54714250	1:54714712-54714905	SINE/tRNA	down	462
1:57219034-57220152	1:57219064-57222769	Satellite/centr	overlap	NA
1:57219034-57220152	1:57218855-57218915	Simple_repeat	up	-119
1:57219034-57220152	1:57222782-57222821	Simple_repeat	down	2630
1:57220519-57223887	1:57219064-57222769	Satellite/centr	overlap	NA
1:57220519-57223887	1:57222782-57222821	Simple_repeat	overlap	NA
1:57220519-57223887	1:57222822-57223826	LTR/ERVK	overlap	NA
1:57220519-57223887	1:57218855-57218915	Simple_repeat	up	-1604
1:57220519-57223887	1:57223932-57224024	SINE/tRNA	down	45
1:57404281-57404620	1:57404342-57404408	SINE/tRNA-Core-RTE	overlap	NA
1:57404281-57404620	1:57404409-57405711	LINE/RTE-BovB	overlap	NA
1:57404281-57404620	1:57403957-57404115	SINE/MIR	up	-166
1:57404281-57404620	1:57405712-57405786	LTR/ERVK	down	1092
1:57453138-57454414	1:57453114-57454388	Satellite/centr	overlap	NA
1:57453138-57454414	1:57450984-57453012	Satellite/centr	up	-126
1:57453138-57454414	1:57454489-57456532	Satellite/centr	down	75
1:57461659-57462391	1:57460382-57462335	Satellite/centr	overlap	NA
1:57461659-57462391	1:57458604-57460281	Satellite/centr	up	-1378
1:57461659-57462391	1:57462436-57463944	Satellite/centr	down	45
1:57464741-57465441	1:57464045-57465539	Satellite/centr	overlap	NA
1:57464741-57465441	1:57462436-57463944	Satellite/centr	up	-797
1:57464741-57465441	1:57465640-57467580	Satellite/centr	down	199
1:57465770-57466775	1:57465640-57467580	Satellite/centr	overlap	NA
1:57465770-57466775	1:57464045-57465539	Satellite/centr	up	-231
1:57465770-57466775	1:57467685-57469342	Satellite/centr	down	910
1:57481006-57484069	1:57480915-57484080	Satellite/centr	overlap	NA
1:57481006-57484069	1:57478584-57480814	Satellite/centr	up	-192
1:57481006-57484069	1:57484185-57485421	Satellite/centr	down	116
1:57553128-57554101	1:57553109-57554091	Satellite/centr	overlap	NA
1:57553128-57554101	1:57552425-57552966	LINE/L1	up	-162
1:57553128-57554101	1:57554193-57554473	LINE/L1	down	92
1:57608881-57609445	1:57608833-57608897	SINE/Core-RTE	overlap	NA
1:57608881-57609445	1:57608898-57609115	LINE/RTE-BovB	overlap	NA
1:57608881-57609445	1:57609121-57610522	LINE/L1	overlap	NA
1:57608881-57609445	1:57608562-57608822	LINE/L1	up	-59
1:57608881-57609445	1:57610523-57610753	DNA/hAT-Charlie	down	1078
1:59118081-59118444	1:59117580-59118651	LINE/L1	overlap	NA
1:59118081-59118444	1:59117300-59117499	SINE/tRNA-Core-RTE	up	-582
1:59118081-59118444	1:59119186-59119277	Simple_repeat	down	742
1:59135001-59135443	1:59134829-59134925	DNA/hAT-Tip100	up	-76
1:59135001-59135443	1:59135623-59135668	Low_complexity	down	180
1:59272775-59273052	1:59272650-59273033	LINE/L1	overlap	NA
1:59272775-59273052	1:59273034-59273257	SINE/tRNA-Core-RTE	overlap	NA
1:59272775-59273052	1:59272417-59272599	SINE/tRNA-Core-RTE	up	-176
1:59272775-59273052	1:59273258-59273328	LINE/L1	down	206
1:62844018-62844343	1:62842752-62842959	SINE/tRNA-Core-RTE	up	-1059
1:62844018-62844343	1:62844408-62844631	SINE/tRNA-Core-RTE	down	65
1:62968451-62969217	1:62968777-62968806	Low_complexity	overlap	NA
1:62968451-62969217	1:62968811-62968854	Simple_repeat	overlap	NA
1:62968451-62969217	1:62967923-62968194	SINE/Core-RTE	up	-257
1:62968451-62969217	1:62970694-62970729	Simple_repeat	down	1477
1:63361894-63362263	1:63361460-63362032	LINE/L2	overlap	NA
1:63361894-63362263	1:63362087-63363903	LINE/L1	overlap	NA
1:63361894-63362263	1:63360715-63360796	LTR/ERVL-MaLR	up	-1098
1:63361894-63362263	1:63364170-63364411	LTR/ERVL	down	1907
1:63473853-63474235	1:63474213-63474517	LINE/L2	overlap	NA
1:63473853-63474235	1:63473647-63473773	SINE/Core-RTE	up	-80
1:63473853-63474235	1:63475678-63475740	SINE/MIR	down	1443
1:63628627-63629455	1:63627798-63629700	LINE/L1	overlap	NA
1:63628627-63629455	1:63627232-63627461	SINE/MIR	up	-1166
1:63628627-63629455	1:63630443-63630519	LINE/L1	down	988
1:63906100-63906473	1:63905877-63906115	LTR/ERVL	overlap	NA
1:63906100-63906473	1:63906384-63906566	LTR/ERVL	overlap	NA
1:63906100-63906473	1:63905800-63905875	SINE/Core-RTE	up	-225
1:63906100-63906473	1:63906567-63906978	LTR/ERVL-MaLR	down	94
1:64347429-64347870	1:64347597-64347812	DNA/hAT-Charlie	overlap	NA
1:64347429-64347870	1:64346567-64346658	SINE/MIR	up	-771
1:64347429-64347870	1:64348187-64348322	SINE/MIR	down	317
1:64576807-64577195	1:64576609-64576642	Simple_repeat	up	-165
1:64576807-64577195	1:64577995-64578035	Simple_repeat	down	800
1:64705276-64705552	1:64704197-64704525	LINE/L1	up	-751
1:64705276-64705552	1:64706257-64706502	LINE/RTE-BovB	down	705
1:64744158-64744770	1:64744502-64744655	DNA/hAT-Charlie	overlap	NA
1:64744158-64744770	1:64743996-64744043	SINE/MIR	up	-115
1:64744158-64744770	1:64745579-64745737	SINE/MIR	down	809
1:65731247-65731614	1:65730876-65732058	LINE/L2	overlap	NA
1:65731247-65731614	1:65730534-65730812	SINE/tRNA	up	-435
1:65731247-65731614	1:65732059-65732276	SINE/tRNA-Core-RTE	down	445
1:65893085-65893340	1:65892568-65892780	SINE/MIR	up	-305
1:65893085-65893340	1:65893373-65893399	Simple_repeat	down	33
1:67118051-67118747	1:67118533-67118812	DNA/hAT-Charlie	overlap	NA
1:67118051-67118747	1:67117681-67117885	SINE/tRNA-Core-RTE	up	-166
1:67118051-67118747	1:67119057-67119295	SINE/MIR	down	310
1:67197171-67197457	1:67197194-67197269	LINE/L2	overlap	NA
1:67197171-67197457	1:67197092-67197164	DNA/hAT-Charlie	up	-7
1:67197171-67197457	1:67197612-67197641	Simple_repeat	down	155
1:67884612-67885425	1:67884911-67885004	LTR/ERVL-MaLR	overlap	NA
1:67884612-67885425	1:67885030-67885139	SINE/MIR	overlap	NA
1:67884612-67885425	1:67885147-67885259	SINE/tRNA-Core-RTE	overlap	NA
1:67884612-67885425	1:67884225-67884363	LTR/ERVL-MaLR	up	-249
1:67884612-67885425	1:67885525-67885599	SINE/MIR	down	100
1:67959429-67959859	1:67959663-67959685	Simple_repeat	overlap	NA
1:67959429-67959859	1:67959192-67959317	LINE/CR1	up	-112
1:67959429-67959859	1:67960798-67960870	LINE/L2	down	939
1:68116484-68116927	1:68116253-68116649	LINE/RTE-BovB	overlap	NA
1:68116484-68116927	1:68116686-68116986	LINE/L2	overlap	NA
1:68116484-68116927	1:68116189-68116251	SINE/tRNA-Core-RTE	up	-233
1:68116484-68116927	1:68117056-68117167	LINE/L1	down	129
1:68349366-68349854	1:68349270-68349449	LTR/ERVL-MaLR	overlap	NA
1:68349366-68349854	1:68349074-68349266	LINE/L1	up	-100
1:68349366-68349854	1:68350088-68350288	SINE/MIR	down	234
1:68700014-68700354	1:68699118-68699184	SINE/tRNA-Core-RTE	up	-830
1:68700014-68700354	1:68701156-68701180	Simple_repeat	down	802
1:69188192-69188658	1:69188215-69188376	SINE/MIR	overlap	NA
1:69188192-69188658	1:69188578-69189149	DNA/TcMar-Tigger	overlap	NA
1:69188192-69188658	1:69186608-69186663	SINE/MIR	up	-1529
1:69188192-69188658	1:69189581-69189747	LTR/ERVL-MaLR	down	923
1:69232737-69233013	1:69232408-69232551	DNA/hAT-Charlie	up	-186
1:69232737-69233013	1:69233500-69233739	LINE/L2	down	487
1:69279398-69279659	1:69279250-69279293	Simple_repeat	up	-105
1:69279398-69279659	1:69279731-69280002	SINE/Core-RTE	down	72
1:69649825-69650245	1:69648538-69648951	LINE/L1	up	-874
1:69649825-69650245	1:69651152-69651334	LINE/CR1	down	907
1:69958924-69959381	1:69958746-69958771	LINE/RTE-BovB	up	-153
1:69958924-69959381	1:69959748-69959805	Low_complexity	down	367
1:70120945-70121660	1:70121365-70121552	LINE/L2	overlap	NA
1:70120945-70121660	1:70120456-70120850	LTR/ERVL-MaLR	up	-95
1:70120945-70121660	1:70122095-70122333	LTR/ERVL	down	435
1:71052842-71053184	1:71052989-71053185	SINE/MIR	overlap	NA
1:71052842-71053184	1:71052656-71052802	LINE/RTE-BovB	up	-40
1:71052842-71053184	1:71053551-71053589	Simple_repeat	down	367
1:72767639-72768226	1:72766976-72767725	LINE/L1	overlap	NA
1:72767639-72768226	1:72767899-72767983	LINE/L1	overlap	NA
1:72767639-72768226	1:72767979-72768464	LINE/L1	overlap	NA
1:72767639-72768226	1:72766866-72766981	LINE/RTE-BovB	up	-658
1:72767639-72768226	1:72768465-72768536	SINE/tRNA	down	239
1:72806645-72806952	1:72806080-72806310	SINE/Core-RTE	up	-335
1:72806645-72806952	1:72806992-72807261	SINE/Core-RTE	down	40
1:73068725-73069292	1:73069019-73069043	Simple_repeat	overlap	NA
1:73068725-73069292	1:73069151-73069825	LINE/L1	overlap	NA
1:73068725-73069292	1:73068183-73068439	LINE/CR1	up	-286
1:73068725-73069292	1:73070079-73070200	SINE/MIR	down	787
1:73770020-73770514	1:73769860-73770089	LINE/L2	overlap	NA
1:73770020-73770514	1:73770090-73770312	DNA/hAT-Charlie	overlap	NA
1:73770020-73770514	1:73770313-73770366	LINE/L2	overlap	NA
1:73770020-73770514	1:73770469-73770678	LINE/L2	overlap	NA
1:73770020-73770514	1:73769527-73769785	LTR/ERVL-MaLR	up	-235
1:73770020-73770514	1:73771151-73771339	LINE/L1	down	637
1:73785379-73785804	1:73784992-73785049	LINE/L2	up	-330
1:73785379-73785804	1:73787148-73787184	Simple_repeat	down	1344
1:73788194-73788548	1:73788133-73788274	LINE/L1	overlap	NA
1:73788194-73788548	1:73787148-73787184	Simple_repeat	up	-1010
1:73788194-73788548	1:73790119-73790219	SINE/MIR	down	1571
1:75037643-75038063	1:75037565-75038067	LINE/L2	overlap	NA
1:75037643-75038063	1:75037358-75037564	SINE/tRNA-Core-RTE	up	-79
1:75037643-75038063	1:75038347-75038410	SINE/MIR	down	284
1:75724648-75725057	1:75724685-75724837	SINE/MIR	overlap	NA
1:75724648-75725057	1:75724338-75724490	LINE/L2	up	-158
1:75724648-75725057	1:75725261-75725327	SINE/tRNA-Core-RTE	down	204
1:76383972-76385067	1:76383884-76384204	LINE/L1	overlap	NA
1:76383972-76385067	1:76382055-76382375	LINE/L2	up	-1597
1:76383972-76385067	1:76385281-76385436	LINE/L1	down	214
1:76635161-76635964	1:76633698-76636819	LINE/L1	overlap	NA
1:76635161-76635964	1:76633034-76633697	LINE/L1	up	-1464
1:76635161-76635964	1:76636822-76636903	Low_complexity	down	858
1:77373654-77374153	1:77373776-77373929	LINE/L2	overlap	NA
1:77373654-77374153	1:77373952-77373971	Simple_repeat	overlap	NA
1:77373654-77374153	1:77374034-77374089	SINE/MIR	overlap	NA
1:77373654-77374153	1:77373274-77373317	Simple_repeat	up	-337
1:77373654-77374153	1:77374420-77374549	DNA/hAT-Charlie	down	267
1:78079802-78080185	1:78079953-78080126	SINE/MIR	overlap	NA
1:78079802-78080185	1:78079368-78079474	SINE/tRNA	up	-328
1:78079802-78080185	1:78082486-78082709	SINE/tRNA-Core-RTE	down	2301
1:78536972-78537615	1:78536871-78537375	LTR/ERV1	overlap	NA
1:78536972-78537615	1:78537546-78537585	SINE/Core-RTE	overlap	NA
1:78536972-78537615	1:78536658-78536870	SINE/tRNA-Core-RTE	up	-102
1:78536972-78537615	1:78537628-78538119	LTR/ERV1	down	13
1:79659245-79659783	1:79658203-79658322	SINE/MIR	up	-923
1:79659245-79659783	1:79659914-79659963	Simple_repeat	down	131
1:80846718-80847090	1:80846016-80846413	LINE/L1	up	-305
1:80846718-80847090	1:80847174-80847315	SINE/MIR	down	84
1:81194738-81195202	1:81194631-81194907	LTR/ERVL	overlap	NA
1:81194738-81195202	1:81195033-81195167	LTR/ERVL	overlap	NA
1:81194738-81195202	1:81195183-81195334	DNA/TcMar-Tigger	overlap	NA
1:81194738-81195202	1:81194140-81194628	LTR/ERV1	up	-110
1:81194738-81195202	1:81195335-81195551	SINE/tRNA-Core-RTE	down	133
1:81426944-81427195	1:81427117-81427331	SINE/MIR	overlap	NA
1:81426944-81427195	1:81426413-81426684	SINE/Core-RTE	up	-260
1:81426944-81427195	1:81427373-81427500	LTR/Gypsy?	down	178
1:81711767-81712110	1:81711550-81711918	DNA/hAT-Charlie	overlap	NA
1:81711767-81712110	1:81711003-81711037	Simple_repeat	up	-730
1:81711767-81712110	1:81712391-81712581	SINE/MIR	down	281
1:82027864-82028253	1:82026885-82026991	LINE/L2	up	-873
1:82027864-82028253	1:82028989-82029235	DNA/hAT-Charlie	down	736
1:82038458-82038753	1:82038730-82038807	SINE/Core-RTE	overlap	NA
1:82038458-82038753	1:82038085-82038344	LINE/RTE-X	up	-114
1:82038458-82038753	1:82038808-82038906	LINE/RTE-BovB	down	55
1:82267623-82268466	1:82267455-82267718	SINE/Core-RTE	overlap	NA
1:82267623-82268466	1:82267750-82267824	LINE/L1	overlap	NA
1:82267623-82268466	1:82267827-82268031	SINE/tRNA-Core-RTE	overlap	NA
1:82267623-82268466	1:82268038-82268134	LINE/L1	overlap	NA
1:82267623-82268466	1:82268146-82268237	SINE/tRNA-Core-RTE	overlap	NA
1:82267623-82268466	1:82268238-82268726	LINE/L1	overlap	NA
1:82267623-82268466	1:82267266-82267403	SINE/tRNA-Core-RTE	up	-220
1:82267623-82268466	1:82268727-82268845	SINE/tRNA-Core-RTE	down	261
1:83084187-83084444	1:83084130-83084176	Low_complexity	up	-11
1:83084187-83084444	1:83084921-83085154	SINE/MIR	down	477
1:83173012-83173632	1:83173479-83173583	SINE/MIR	overlap	NA
1:83173012-83173632	1:83171932-83172087	SINE/Core-RTE	up	-925
1:83173012-83173632	1:83173980-83174028	SINE/MIR	down	348
1:83207384-83207730	1:83207686-83208003	LINE/L2	overlap	NA
1:83207384-83207730	1:83205652-83205909	LINE/L2	up	-1475
1:83207384-83207730	1:83208197-83208310	SINE/MIR	down	467
1:83530483-83530837	1:83530788-83530816	Simple_repeat	overlap	NA
1:83530483-83530837	1:83530031-83530136	SINE/tRNA-Core-RTE	up	-347
1:83530483-83530837	1:83530938-83531020	Simple_repeat	down	101
1:83542582-83543190	1:83542217-83542630	LINE/L2	overlap	NA
1:83542582-83543190	1:83542057-83542258	SINE/MIR	up	-324
1:83542582-83543190	1:83544096-83544208	SINE/MIR	down	906
1:84511293-84511917	1:84511463-84511685	LINE/L2	overlap	NA
1:84511293-84511917	1:84510729-84510802	LINE/RTE-BovB	up	-491
1:84511293-84511917	1:84512711-84512750	Simple_repeat	down	794
1:84804094-84805289	1:84804031-84805416	Satellite/centr	overlap	NA
1:84804094-84805289	1:84803732-84803930	SINE/Core-RTE	up	-164
1:84804094-84805289	1:84806236-84806544	SINE/tRNA	down	947
1:85452213-85452491	1:85451944-85452214	SINE/Core-RTE	overlap	NA
1:85452213-85452491	1:85451210-85451485	LINE/L1	up	-728
1:85452213-85452491	1:85452547-85453059	LINE/L1	down	56
1:85674427-85674749	1:85674204-85674265	Simple_repeat	up	-162
1:85674427-85674749	1:85675688-85675721	Simple_repeat	down	939
1:85933981-85934416	1:85934283-85934333	Simple_repeat	overlap	NA
1:85933981-85934416	1:85933921-85933956	Simple_repeat	up	-25
1:85933981-85934416	1:85934679-85934714	Simple_repeat	down	263
1:88425352-88425836	1:88424986-88425206	SINE/tRNA-Core-RTE	up	-146
1:88425352-88425836	1:88426090-88426681	LTR/ERV1	down	254
1:88636514-88636856	1:88636151-88636217	LINE/CR1	up	-297
1:88636514-88636856	1:88637066-88637288	SINE/tRNA-Core-RTE	down	210
1:89019061-89019424	1:89019126-89019290	DNA/TcMar-Tigger	overlap	NA
1:89019061-89019424	1:89018777-89018867	DNA/hAT-Charlie	up	-194
1:89019061-89019424	1:89019936-89020166	SINE/MIR	down	512
1:89551655-89552175	1:89551521-89551933	LINE/L2	overlap	NA
1:89551655-89552175	1:89551971-89552086	SINE/tRNA	overlap	NA
1:89551655-89552175	1:89551053-89551520	LTR/ERVL-MaLR	up	-135
1:89551655-89552175	1:89552292-89552742	LINE/CR1	down	117
1:91708550-91709075	1:91708373-91708507	SINE/Core-RTE	up	-43
1:91708550-91709075	1:91709713-91709757	Low_complexity	down	638
1:95710067-95710513	1:95709940-95710156	LTR/ERVL	overlap	NA
1:95710067-95710513	1:95710157-95710361	SINE/tRNA-Core-RTE	overlap	NA
1:95710067-95710513	1:95710362-95710581	LTR/ERVL	overlap	NA
1:95710067-95710513	1:95709539-95709887	LTR/ERVL	up	-180
1:95710067-95710513	1:95710650-95710716	SINE/tRNA-Core-RTE	down	137
1:95726170-95726474	1:95726048-95727039	LINE/RTE-BovB	overlap	NA
1:95726170-95726474	1:95725931-95726047	Low_complexity	up	-123
1:95726170-95726474	1:95727040-95727106	SINE/tRNA-Core-RTE	down	566
1:96041146-96041654	1:96040419-96040764	Simple_repeat	up	-382
1:96041146-96041654	1:96042025-96042224	SINE/tRNA-Core-RTE	down	371
1:96141173-96141694	1:96141371-96141639	SINE/Core-RTE	overlap	NA
1:96141173-96141694	1:96140960-96141145	SINE/tRNA-Core-RTE	up	-28
1:96141173-96141694	1:96142280-96142296	Simple_repeat	down	586
1:96303405-96303743	1:96303125-96304002	LINE/L2	overlap	NA
1:96303405-96303743	1:96303111-96303123	SINE/Core-RTE	up	-282
1:96303405-96303743	1:96304339-96304543	SINE/tRNA-Core-RTE	down	596
1:96787697-96787956	1:96786485-96786810	DNA/hAT-Charlie	up	-887
1:96787697-96787956	1:96789522-96789553	Low_complexity	down	1566
1:98404131-98404551	1:98404104-98404170	SINE/tRNA-Core-RTE	overlap	NA
1:98404131-98404551	1:98404171-98405157	LINE/RTE-BovB	overlap	NA
1:98404131-98404551	1:98403979-98404041	SINE/tRNA	up	-90
1:98404131-98404551	1:98405259-98405418	SINE/Core-RTE	down	708
1:98408308-98408811	1:98408211-98408759	LTR/ERV1	overlap	NA
1:98408308-98408811	1:98406640-98407222	LTR/ERVL	up	-1086
1:98408308-98408811	1:98409301-98409423	SINE/tRNA	down	490
1:98991128-98991438	1:98990044-98990281	LINE/L2	up	-847
1:98991128-98991438	1:98991971-98991994	Simple_repeat	down	533
1:100702476-100702859	1:100701211-100701364	LTR/ERVL-MaLR	up	-1112
1:100702476-100702859	1:100703735-100703826	LINE/L2	down	876
1:104658423-104659022	1:104658283-104659506	LINE/RTE-BovB	overlap	NA
1:104658423-104659022	1:104657190-104657312	LTR/ERV1	up	-1111
1:104658423-104659022	1:104659507-104659566	SINE/tRNA-Core-RTE	down	485
1:105010222-105010582	1:105010333-105010728	LTR/ERVL	overlap	NA
1:105010222-105010582	1:105009951-105010019	Simple_repeat	up	-203
1:105010222-105010582	1:105010761-105011457	LINE/RTE-BovB	down	179
1:106635060-106635374	1:106634733-106634778	Low_complexity	up	-282
1:106635060-106635374	1:106635405-106635569	LINE/RTE-BovB	down	31
1:107634776-107635614	1:107634514-107636046	LINE/L1	overlap	NA
1:107634776-107635614	1:107633768-107634099	LTR/ERV1	up	-677
1:107634776-107635614	1:107636047-107636079	Simple_repeat	down	433
1:107688340-107688727	1:107686645-107686803	LINE/L2	up	-1537
1:107688340-107688727	1:107688879-107689087	LINE/L1	down	152
1:108171189-108171666	1:108171318-108171708	DNA/hAT-Charlie	overlap	NA
1:108171189-108171666	1:108171007-108171131	SINE/MIR	up	-58
1:108171189-108171666	1:108171713-108171929	SINE/tRNA-Core-RTE	down	47
1:108346069-108346364	1:108346002-108346111	LINE/L2	overlap	NA
1:108346069-108346364	1:108346158-108346219	LINE/RTE-BovB	overlap	NA
1:108346069-108346364	1:108346221-108346267	SINE/tRNA-Core-RTE	overlap	NA
1:108346069-108346364	1:108345992-108346032	LINE/L2	up	-37
1:108346069-108346364	1:108346729-108346839	Simple_repeat	down	365
1:108420648-108420992	1:108420707-108421131	LINE/L1	overlap	NA
1:108420648-108420992	1:108420341-108420609	SINE/Core-RTE	up	-39
1:108420648-108420992	1:108421132-108421167	Simple_repeat	down	140
1:108553466-108553896	1:108553603-108553641	Simple_repeat	overlap	NA
1:108553466-108553896	1:108552905-108552949	Simple_repeat	up	-517
1:108553466-108553896	1:108554284-108554359	LINE/L1	down	388
1:108807718-108807995	1:108807071-108807198	LINE/L2	up	-520
1:108807718-108807995	1:108808276-108808479	SINE/tRNA-Core-RTE	down	281
1:109007037-109007522	1:109006183-109007131	LINE/RTE-BovB	overlap	NA
1:109007037-109007522	1:109007132-109007198	SINE/tRNA-Core-RTE	overlap	NA
1:109007037-109007522	1:109007377-109007399	Simple_repeat	overlap	NA
1:109007037-109007522	1:109005935-109006128	SINE/tRNA-Core-RTE	up	-909
1:109007037-109007522	1:109007976-109009122	LINE/RTE-BovB	down	454
1:111446714-111447054	1:111446725-111446869	LINE/CR1	overlap	NA
1:111446714-111447054	1:111447029-111447242	SINE/tRNA	overlap	NA
1:111446714-111447054	1:111446589-111446631	LINE/L2	up	-83
1:111446714-111447054	1:111447696-111447712	Simple_repeat	down	642
1:111801298-111801618	1:111800589-111800724	LINE/L1	up	-574
1:111801298-111801618	1:111802481-111802595	SINE/MIR	down	863
1:112122622-112122987	1:112122467-112125423	LINE/L1	overlap	NA
1:112122622-112122987	1:112120342-112122474	LINE/L1	up	-148
1:112122622-112122987	1:112126848-112126923	LINE/L2	down	3861
1:115033219-115033803	1:115033715-115033845	LINE/L2	overlap	NA
1:115033219-115033803	1:115031359-115031532	DNA/hAT-Charlie	up	-1687
1:115033219-115033803	1:115033854-115033908	SINE/MIR	down	51
1:117919624-117919902	1:117919809-117919898	LINE/RTE-BovB	overlap	NA
1:117919624-117919902	1:117918552-117918657	SINE/MIR	up	-967
1:117919624-117919902	1:117920135-117920904	LINE/L2	down	233
1:119602226-119602504	1:119602016-119602111	LTR/ERVL	up	-115
1:119602226-119602504	1:119602551-119602674	DNA/hAT-Charlie	down	47
1:120165434-120165823	1:120165413-120165551	DNA/hAT-Charlie	overlap	NA
1:120165434-120165823	1:120165552-120165665	SINE/tRNA	overlap	NA
1:120165434-120165823	1:120165666-120165750	DNA/hAT-Charlie	overlap	NA
1:120165434-120165823	1:120164873-120165148	LINE/CR1	up	-286
1:120165434-120165823	1:120165836-120165887	LTR/ERVL-MaLR	down	13
1:120261810-120262124	1:120261888-120261945	Simple_repeat	overlap	NA
1:120261810-120262124	1:120262051-120262115	SINE/Core-RTE	overlap	NA
1:120261810-120262124	1:120261677-120261773	LINE/L1	up	-37
1:120261810-120262124	1:120263500-120263697	SINE/tRNA-Core-RTE	down	1376
1:120390223-120390491	1:120390216-120390529	SINE/tRNA	overlap	NA
1:120390223-120390491	1:120389205-120389232	Simple_repeat	up	-991
1:120390223-120390491	1:120390806-120391034	DNA/hAT-Charlie	down	315
1:122168173-122168678	1:122168407-122168470	DNA	overlap	NA
1:122168173-122168678	1:122166861-122166919	LINE/CR1	up	-1254
1:122168173-122168678	1:122169202-122169560	LTR/ERVL-MaLR	down	524
1:124045017-124045839	1:124044966-124045036	LTR/ERVK	overlap	NA
1:124045017-124045839	1:124045037-124046337	LINE/RTE-BovB	overlap	NA
1:124045017-124045839	1:124044860-124044965	LINE/RTE-BovB	up	-52
1:124045017-124045839	1:124046338-124046404	SINE/tRNA-Core-RTE	down	499
1:124938194-124939360	1:124938187-124941408	Satellite/centr	overlap	NA
1:124938194-124939360	1:124937947-124938086	SINE/Core-RTE	up	-108
1:124938194-124939360	1:124941509-124942664	Satellite/centr	down	2149
1:124945719-124950314	1:124945672-124946967	Satellite/centr	overlap	NA
1:124945719-124950314	1:124947068-124951081	Satellite/centr	overlap	NA
1:124945719-124950314	1:124944417-124945571	Satellite/centr	up	-148
1:124945719-124950314	1:124951183-124952834	Satellite/centr	down	869
1:124951240-124952001	1:124951183-124952834	Satellite/centr	overlap	NA
1:124951240-124952001	1:124947068-124951081	Satellite/centr	up	-159
1:124951240-124952001	1:124952935-124954754	Satellite/centr	down	934
1:124952979-124954629	1:124952935-124954754	Satellite/centr	overlap	NA
1:124952979-124954629	1:124951183-124952834	Satellite/centr	up	-145
1:124952979-124954629	1:124955729-124956029	LINE/L1	down	1100
1:125746544-125746839	1:125746489-125746929	LINE/RTE-BovB	overlap	NA
1:125746544-125746839	1:125746224-125746386	DNA/hAT-Charlie	up	-158
1:125746544-125746839	1:125746928-125747487	LINE/RTE-BovB	down	89
1:126290806-126291077	1:126290180-126290603	LINE/L1	up	-203
1:126290806-126291077	1:126291097-126291142	LTR/ERVL-MaLR	down	20
1:126650390-126650669	1:126649475-126649629	LINE/CR1	up	-761
1:126650390-126650669	1:126650830-126651020	SINE/MIR	down	161
1:127140000-127140301	1:127139707-127140052	LINE/L2	overlap	NA
1:127140000-127140301	1:127140053-127140240	SINE/tRNA	overlap	NA
1:127140000-127140301	1:127140241-127140406	LINE/L2	overlap	NA
1:127140000-127140301	1:127139406-127139667	LINE/L1	up	-333
1:127140000-127140301	1:127141029-127141116	DNA/hAT-Charlie	down	728
1:127797247-127797599	1:127797088-127797295	SINE/tRNA-Core-RTE	overlap	NA
1:127797247-127797599	1:127797296-127797413	LINE/L1	overlap	NA
1:127797247-127797599	1:127797422-127797587	SINE/tRNA-Core-RTE	overlap	NA
1:127797247-127797599	1:127797590-127798271	LINE/L1	overlap	NA
1:127797247-127797599	1:127796941-127797087	LINE/L1	up	-160
1:127797247-127797599	1:127798279-127798382	SINE/tRNA	down	680
1:128151527-128151834	1:128151153-128151671	LTR/ERV1	overlap	NA
1:128151527-128151834	1:128151679-128152048	LTR/ERVL	overlap	NA
1:128151527-128151834	1:128150983-128151152	SINE/tRNA-Core-RTE	up	-375
1:128151527-128151834	1:128152061-128152199	SINE/MIR	down	227
1:128352596-128353153	1:128352578-128352771	LINE/L1	overlap	NA
1:128352596-128353153	1:128352169-128352400	LINE/L2	up	-196
1:128352596-128353153	1:128353514-128353926	LINE/L1	down	361
1:128701768-128702207	1:128701872-128702037	SINE/MIR	overlap	NA
1:128701768-128702207	1:128702065-128702191	SINE/MIR	overlap	NA
1:128701768-128702207	1:128700858-128700912	DNA/hAT	up	-856
1:128701768-128702207	1:128703044-128703256	SINE/MIR	down	837
1:128760752-128761264	1:128761042-128761133	LINE/L2	overlap	NA
1:128760752-128761264	1:128761138-128761432	LINE/L2	overlap	NA
1:128760752-128761264	1:128759807-128760121	LTR/ERVL	up	-631
1:128760752-128761264	1:128761488-128761517	Low_complexity	down	224
1:128768175-128768467	1:128768294-128768326	Low_complexity	overlap	NA
1:128768175-128768467	1:128768466-128768570	DNA/TcMar-Tigger	overlap	NA
1:128768175-128768467	1:128767231-128767488	SINE/Core-RTE	up	-687
1:128768175-128768467	1:128768827-128769038	SINE/tRNA-Core-RTE	down	360
1:128921551-128922094	1:128921928-128922233	LINE/L2	overlap	NA
1:128921551-128922094	1:128921181-128921402	SINE/tRNA-Core-RTE	up	-149
1:128921551-128922094	1:128922236-128922265	Low_complexity	down	142
1:129715013-129715412	1:129715110-129715356	LTR/ERVL	overlap	NA
1:129715013-129715412	1:129715381-129715478	DNA/hAT-Blackjack	overlap	NA
1:129715013-129715412	1:129713405-129713704	LINE/L1	up	-1309
1:129715013-129715412	1:129715608-129715717	LTR/ERVL	down	196
1:130050182-130050556	1:130050011-130050229	SINE/tRNA-Core-RTE	overlap	NA
1:130050182-130050556	1:130049373-130050001	LINE/L2	up	-181
1:130050182-130050556	1:130051680-130051749	LTR/ERVK	down	1124
1:130854508-130855138	1:130853445-130853520	LINE/L2	up	-988
1:130854508-130855138	1:130855911-130856130	SINE/tRNA-Core-RTE	down	773
1:131140487-131140919	1:131140312-131140378	SINE/tRNA-Core-RTE	up	-109
1:131140487-131140919	1:131141812-131141990	SINE/MIR	down	893
1:134059500-134059832	1:134058882-134063439	LINE/L1	overlap	NA
1:134059500-134059832	1:134058841-134058867	Simple_repeat	up	-633
1:134059500-134059832	1:134063440-134063701	SINE/Core-RTE	down	3608
1:134148290-134148715	1:134148232-134148802	LINE/L1	overlap	NA
1:134148290-134148715	1:134148110-134148231	SINE/tRNA-Core-RTE	up	-59
1:134148290-134148715	1:134148811-134149012	SINE/tRNA-Core-RTE	down	96
1:134252922-134253343	1:134252784-134252983	LINE/L1	overlap	NA
1:134252922-134253343	1:134251618-134251712	DNA/TcMar-Tc2	up	-1210
1:134252922-134253343	1:134253414-134253696	LINE/L1	down	71
1:134463930-134464396	1:134463801-134464131	SINE/tRNA	overlap	NA
1:134463930-134464396	1:134464143-134464351	LINE/L2	overlap	NA
1:134463930-134464396	1:134462689-134463644	LINE/L1	up	-286
1:134463930-134464396	1:134464466-134464517	LINE/RTE-BovB	down	70
1:135533153-135533419	1:135528854-135529059	LTR/ERVL-MaLR	up	-4094
1:135533153-135533419	1:135533923-135534124	SINE/tRNA-Core-RTE	down	504
1:135615067-135615488	1:135615046-135616350	LINE/RTE-BovB	overlap	NA
1:135615067-135615488	1:135614980-135615045	SINE/tRNA-Core-RTE	up	-22
1:135615067-135615488	1:135616351-135616421	LTR/ERVK	down	863
1:135631913-135632288	1:135632204-135632254	Simple_repeat	overlap	NA
1:135631913-135632288	1:135631824-135631911	SINE/MIR	up	-2
1:135631913-135632288	1:135633804-135633976	SINE/tRNA-Core-RTE	down	1516
1:135832792-135833632	1:135831816-135833671	Satellite/centr	overlap	NA
1:135832792-135833632	1:135830452-135830918	LINE/L1	up	-1874
1:135832792-135833632	1:135834242-135834275	Simple_repeat	down	610
1:136013412-136014009	1:136013404-136013435	Simple_repeat	overlap	NA
1:136013412-136014009	1:136013436-136013520	LINE/L1	overlap	NA
1:136013412-136014009	1:136013600-136013718	SINE/MIR	overlap	NA
1:136013412-136014009	1:136012689-136012735	Low_complexity	up	-677
1:136013412-136014009	1:136014076-136014283	SINE/tRNA-Core-RTE	down	67
1:136102003-136102406	1:136100827-136100983	DNA/hAT-Charlie	up	-1020
1:136102003-136102406	1:136102548-136102922	LTR/ERVL	down	142
1:136306801-136307051	1:136306247-136306310	Simple_repeat	up	-491
1:136306801-136307051	1:136308106-136308227	LINE/CR1	down	1055
1:136376342-136376882	1:136376160-136376438	LINE/RTE-BovB	overlap	NA
1:136376342-136376882	1:136376439-136376502	SINE/tRNA-Core-RTE	overlap	NA
1:136376342-136376882	1:136376512-136376572	LTR/ERV1	overlap	NA
1:136376342-136376882	1:136376745-136376814	LTR/ERV1	overlap	NA
1:136376342-136376882	1:136375971-136376159	LTR/ERV1	up	-183
1:136376342-136376882	1:136377055-136377279	LTR/ERV1	down	173
1:136403030-136403783	1:136402561-136402700	SINE/MIR	up	-330
1:136403030-136403783	1:136404163-136404251	SINE/MIR	down	380
1:136484869-136485641	1:136484940-136485135	SINE/tRNA-Core-RTE	overlap	NA
1:136484869-136485641	1:136483425-136483662	LINE/L2	up	-1207
1:136484869-136485641	1:136486812-136486943	SINE/MIR	down	1171
1:136577402-136577740	1:136577171-136577342	LINE/L2	up	-60
1:136577402-136577740	1:136578519-136578717	SINE/tRNA-Core-RTE	down	779
1:136630852-136631165	1:136630810-136630836	Simple_repeat	up	-16
1:136630852-136631165	1:136633558-136633614	Low_complexity	down	2393
1:138490834-138491374	1:138489389-138489699	LTR/ERVL-MaLR	up	-1135
1:138490834-138491374	1:138491457-138491606	LINE/RTE-BovB	down	83
1:139204343-139207707	1:139204334-139207852	Satellite/centr	overlap	NA
1:139204343-139207707	1:139203833-139204233	LINE/L1	up	-110
1:139204343-139207707	1:139207962-139209495	Satellite/centr	down	255
1:139208234-139209317	1:139207962-139209495	Satellite/centr	overlap	NA
1:139208234-139209317	1:139204334-139207852	Satellite/centr	up	-382
1:139208234-139209317	1:139210028-139210140	SINE/Core-RTE	down	711
1:139615844-139616234	1:139615653-139616786	LINE/L1	overlap	NA
1:139615844-139616234	1:139615505-139615685	LINE/L1	up	-159
1:139615844-139616234	1:139616803-139617003	SINE/tRNA-Core-RTE	down	569
1:140131023-140131397	1:140131352-140131424	SINE/tRNA-Core-RTE	overlap	NA
1:140131023-140131397	1:140130727-140130858	SINE/tRNA-Core-RTE	up	-165
1:140131023-140131397	1:140131426-140132147	LINE/RTE-BovB	down	29
1:140713537-140713831	1:140713000-140713384	LINE/RTE-BovB	up	-153
1:140713537-140713831	1:140713850-140713985	SINE/Core-RTE	down	19
1:140938868-140939305	1:140939060-140939235	LTR/ERV1	overlap	NA
1:140938868-140939305	1:140939235-140939308	SINE/tRNA-Core-RTE	overlap	NA
1:140938868-140939305	1:140938784-140938850	SINE/tRNA-Core-RTE	up	-18
1:140938868-140939305	1:140939310-140939523	LINE/RTE-BovB	down	5
1:141081209-141081663	1:141080777-141081221	LINE/L1	overlap	NA
1:141081209-141081663	1:141080725-141080776	LTR/ERVK	up	-433
1:141081209-141081663	1:141081885-141082293	LTR/ERVK	down	222
1:141398646-141398990	1:141398361-141398432	SINE/tRNA-Core-RTE	up	-214
1:141398646-141398990	1:141399039-141399130	DNA/hAT-Charlie	down	49
1:141605585-141606260	1:141606083-141606168	Simple_repeat	overlap	NA
1:141605585-141606260	1:141605454-141605520	SINE/tRNA-Core-RTE	up	-65
1:141605585-141606260	1:141607124-141607295	SINE/MIR	down	864
1:142524064-142524322	1:142523987-142524080	SINE/Core-RTE	overlap	NA
1:142524064-142524322	1:142524118-142525150	LINE/L1	overlap	NA
1:142524064-142524322	1:142523826-142523973	LINE/L1	up	-91
1:142524064-142524322	1:142525151-142525416	SINE/Core-RTE	down	829
1:142725408-142725739	1:142725003-142725826	LINE/L1	overlap	NA
1:142725408-142725739	1:142724818-142725001	LINE/L1	up	-407
1:142725408-142725739	1:142725988-142727113	LINE/L1	down	249
1:142878568-142878890	1:142877966-142878160	SINE/MIR	up	-408
1:142878568-142878890	1:142879408-142879659	SINE/MIR	down	518
1:142879317-142879707	1:142879408-142879659	SINE/MIR	overlap	NA
1:142879317-142879707	1:142877966-142878160	SINE/MIR	up	-1157
1:142879317-142879707	1:142879714-142879904	SINE/tRNA	down	7
1:143114479-143115182	1:143114455-143114522	SINE/tRNA-Core-RTE	overlap	NA
1:143114479-143115182	1:143114523-143114877	LINE/RTE-BovB	overlap	NA
1:143114479-143115182	1:143114304-143114437	LINE/L1	up	-42
1:143114479-143115182	1:143115898-143115949	SINE/MIR	down	716
1:143145934-143146187	1:143145945-143146076	SINE/tRNA-Core-RTE	overlap	NA
1:143145934-143146187	1:143146103-143146196	DNA/hAT-Charlie	overlap	NA
1:143145934-143146187	1:143145573-143145751	LINE/L1	up	-183
1:143145934-143146187	1:143146308-143146527	SINE/tRNA-Core-RTE	down	121
1:143220800-143221149	1:143219983-143220049	LINE/L2	up	-751
1:143220800-143221149	1:143221909-143222113	SINE/tRNA-Core-RTE	down	760
1:143397273-143397814	1:143396886-143396980	SINE/tRNA-Core-RTE	up	-293
1:143397273-143397814	1:143397864-143397884	Simple_repeat	down	50
1:143404660-143405090	1:143404722-143404870	LINE/L1	overlap	NA
1:143404660-143405090	1:143404871-143405238	SINE/tRNA	overlap	NA
1:143404660-143405090	1:143404094-143404289	SINE/MIR	up	-371
1:143404660-143405090	1:143405318-143405489	SINE/MIR	down	228
1:143767372-143768166	1:143767384-143767854	LINE/RTE-BovB	overlap	NA
1:143767372-143768166	1:143767855-143767930	SINE/Core-RTE	overlap	NA
1:143767372-143768166	1:143767237-143767255	Simple_repeat	up	-117
1:143767372-143768166	1:143768245-143768346	SINE/tRNA	down	79
1:144045481-144045949	1:144045853-144045904	Low_complexity	overlap	NA
1:144045481-144045949	1:144044991-144045137	LTR/ERVL-MaLR	up	-344
1:144045481-144045949	1:144047028-144047314	LTR/ERVL-MaLR	down	1079
1:144073784-144074275	1:144073803-144080724	Satellite/centr	overlap	NA
1:144073784-144074275	1:144073076-144073143	LTR/ERV1	up	-641
1:144073784-144074275	1:144080825-144083462	Satellite/centr	down	6550
1:144074999-144076750	1:144073803-144080724	Satellite/centr	overlap	NA
1:144074999-144076750	1:144073076-144073143	LTR/ERV1	up	-1856
1:144074999-144076750	1:144080825-144083462	Satellite/centr	down	4075
1:144080962-144083477	1:144080825-144083462	Satellite/centr	overlap	NA
1:144080962-144083477	1:144073803-144080724	Satellite/centr	up	-238
1:144080962-144083477	1:144083563-144085621	Satellite/centr	down	86
1:144083620-144085521	1:144083563-144085621	Satellite/centr	overlap	NA
1:144083620-144085521	1:144080825-144083462	Satellite/centr	up	-158
1:144083620-144085521	1:144085722-144086970	Satellite/centr	down	201
1:144091963-144093730	1:144091829-144093852	Satellite/centr	overlap	NA
1:144091963-144093730	1:144089804-144091728	Satellite/centr	up	-235
1:144091963-144093730	1:144093953-144095885	Satellite/centr	down	223
1:144094109-144095698	1:144093953-144095885	Satellite/centr	overlap	NA
1:144094109-144095698	1:144091829-144093852	Satellite/centr	up	-257
1:144094109-144095698	1:144095987-144097941	Satellite/centr	down	289
1:144111273-144113097	1:144111184-144113168	Satellite/centr	overlap	NA
1:144111273-144113097	1:144109533-144111073	Satellite/centr	up	-200
1:144111273-144113097	1:144113269-144114785	Satellite/centr	down	172
1:144126672-144128671	1:144125633-144127583	Satellite/centr	overlap	NA
1:144126672-144128671	1:144127684-144129661	Satellite/centr	overlap	NA
1:144126672-144128671	1:144122578-144125532	Satellite/centr	up	-1140
1:144126672-144128671	1:144129765-144131035	Satellite/centr	down	1094
1:144129766-144130916	1:144129765-144131035	Satellite/centr	overlap	NA
1:144129766-144130916	1:144127684-144129661	Satellite/centr	up	-105
1:144129766-144130916	1:144131136-144132420	Satellite/centr	down	220
1:144292305-144292824	1:144291965-144292236	LTR/ERV1	up	-69
1:144292305-144292824	1:144292906-144293146	LINE/L1	down	82
1:144430637-144431119	1:144430681-144430776	SINE/tRNA	overlap	NA
1:144430637-144431119	1:144430782-144430798	Simple_repeat	overlap	NA
1:144430637-144431119	1:144429956-144430272	LINE/L1	up	-365
1:144430637-144431119	1:144431210-144431407	SINE/MIR	down	91
1:144566745-144567134	1:144565439-144565826	LINE/RTE-BovB	up	-919
1:144566745-144567134	1:144567181-144567287	Simple_repeat	down	47
1:144664561-144665046	1:144661412-144663235	LINE/L1	up	-1326
1:144664561-144665046	1:144665899-144666087	LINE/L2	down	853
1:145132648-145133043	1:145132689-145132927	Simple_repeat	overlap	NA
1:145132648-145133043	1:145132978-145133038	Low_complexity	overlap	NA
1:145132648-145133043	1:145130770-145130808	LTR/ERVL	up	-1840
1:145132648-145133043	1:145134080-145134128	Simple_repeat	down	1037
1:145293422-145304854	1:145293425-145299726	Satellite/centr	overlap	NA
1:145293422-145304854	1:145299852-145301321	Satellite/centr	overlap	NA
1:145293422-145304854	1:145301422-145302751	Satellite/centr	overlap	NA
1:145293422-145304854	1:145302861-145307801	Satellite/centr	overlap	NA
1:145293422-145304854	1:145291949-145293324	LINE/L1	up	-98
1:145293422-145304854	1:145307904-145311705	Satellite/centr	down	3050
1:145304872-145306957	1:145302861-145307801	Satellite/centr	overlap	NA
1:145304872-145306957	1:145301422-145302751	Satellite/centr	up	-2121
1:145304872-145306957	1:145307904-145311705	Satellite/centr	down	947
1:145313617-145324559	1:145313641-145317852	Satellite/centr	overlap	NA
1:145313617-145324559	1:145317956-145319780	Satellite/centr	overlap	NA
1:145313617-145324559	1:145319883-145321404	Satellite/centr	overlap	NA
1:145313617-145324559	1:145321379-145323264	Satellite/centr	overlap	NA
1:145313617-145324559	1:145323236-145324517	Satellite/centr	overlap	NA
1:145313617-145324559	1:145311958-145313540	Satellite/centr	up	-77
1:145313617-145324559	1:145324618-145326226	Satellite/centr	down	59
1:145324723-145330631	1:145324618-145326226	Satellite/centr	overlap	NA
1:145324723-145330631	1:145326327-145327727	Satellite/centr	overlap	NA
1:145324723-145330631	1:145327828-145332187	Satellite/centr	overlap	NA
1:145324723-145330631	1:145323236-145324517	Satellite/centr	up	-206
1:145324723-145330631	1:145332289-145333486	Satellite/centr	down	1658
1:145330884-145332029	1:145327828-145332187	Satellite/centr	overlap	NA
1:145330884-145332029	1:145326327-145327727	Satellite/centr	up	-3157
1:145330884-145332029	1:145332289-145333486	Satellite/centr	down	260
1:145339344-145341055	1:145339336-145341119	Satellite/centr	overlap	NA
1:145339344-145341055	1:145337770-145339221	Satellite/centr	up	-123
1:145339344-145341055	1:145341113-145341999	Satellite/centr	down	58
1:145341199-145341824	1:145341113-145341999	Satellite/centr	overlap	NA
1:145341199-145341824	1:145339336-145341119	Satellite/centr	up	-80
1:145341199-145341824	1:145342103-145343255	Satellite/centr	down	279
1:145342051-145343122	1:145342103-145343255	Satellite/centr	overlap	NA
1:145342051-145343122	1:145341113-145341999	Satellite/centr	up	-52
1:145342051-145343122	1:145343356-145344491	Satellite/centr	down	234
1:145349799-145356958	1:145349787-145350894	Satellite/centr	overlap	NA
1:145349799-145356958	1:145351031-145351923	Satellite/centr	overlap	NA
1:145349799-145356958	1:145351920-145352257	Satellite/centr	overlap	NA
1:145349799-145356958	1:145352363-145353941	Satellite/centr	overlap	NA
1:145349799-145356958	1:145354045-145355221	Satellite/centr	overlap	NA
1:145349799-145356958	1:145355333-145356805	Satellite/centr	overlap	NA
1:145349799-145356958	1:145356906-145358383	Satellite/centr	overlap	NA
1:145349799-145356958	1:145348426-145349680	Satellite/centr	up	-119
1:145349799-145356958	1:145358497-145359774	Satellite/centr	down	1539
1:145357080-145361136	1:145356906-145358383	Satellite/centr	overlap	NA
1:145357080-145361136	1:145358497-145359774	Satellite/centr	overlap	NA
1:145357080-145361136	1:145359875-145361039	Satellite/centr	overlap	NA
1:145357080-145361136	1:145355333-145356805	Satellite/centr	up	-275
1:145357080-145361136	1:145361143-145363799	Satellite/centr	down	7
1:145362652-145363378	1:145361143-145363799	Satellite/centr	overlap	NA
1:145362652-145363378	1:145359875-145361039	Satellite/centr	up	-1613
1:145362652-145363378	1:145363901-145365586	Satellite/centr	down	523
1:145364755-145372537	1:145363901-145365586	Satellite/centr	overlap	NA
1:145364755-145372537	1:145365687-145366937	Satellite/centr	overlap	NA
1:145364755-145372537	1:145367041-145369890	Satellite/centr	overlap	NA
1:145364755-145372537	1:145369995-145372650	Satellite/centr	overlap	NA
1:145364755-145372537	1:145361143-145363799	Satellite/centr	up	-956
1:145364755-145372537	1:145372751-145374257	Satellite/centr	down	214
1:145372740-145378681	1:145372751-145374257	Satellite/centr	overlap	NA
1:145372740-145378681	1:145374231-145375730	Satellite/centr	overlap	NA
1:145372740-145378681	1:145375831-145376938	Satellite/centr	overlap	NA
1:145372740-145378681	1:145376917-145378841	Satellite/centr	overlap	NA
1:145372740-145378681	1:145369995-145372650	Satellite/centr	up	-90
1:145372740-145378681	1:145378944-145378976	Satellite/centr	down	263
1:145382243-145385074	1:145382206-145383647	Satellite/centr	overlap	NA
1:145382243-145385074	1:145383751-145384995	Satellite/centr	overlap	NA
1:145382243-145385074	1:145381150-145382103	Satellite/centr	up	-140
1:145382243-145385074	1:145385101-145386848	Satellite/centr	down	27
1:145395132-145399201	1:145394829-145399007	Satellite/centr	overlap	NA
1:145395132-145399201	1:145398988-145401893	Satellite/centr	overlap	NA
1:145395132-145399201	1:145393354-145394728	Satellite/centr	up	-404
1:145395132-145399201	1:145401998-145403512	Satellite/centr	down	2797
1:145399221-145403401	1:145398988-145401893	Satellite/centr	overlap	NA
1:145399221-145403401	1:145401998-145403512	Satellite/centr	overlap	NA
1:145399221-145403401	1:145394829-145399007	Satellite/centr	up	-214
1:145399221-145403401	1:145403624-145405136	Satellite/centr	down	223
1:145408513-145412610	1:145406987-145409613	Satellite/centr	overlap	NA
1:145408513-145412610	1:145409586-145411329	Satellite/centr	overlap	NA
1:145408513-145412610	1:145411437-145415407	Satellite/centr	overlap	NA
1:145408513-145412610	1:145405237-145406885	Satellite/centr	up	-1628
1:145408513-145412610	1:145415508-145416783	Satellite/centr	down	2898
1:145416994-145418172	1:145416884-145418251	Satellite/centr	overlap	NA
1:145416994-145418172	1:145415508-145416783	Satellite/centr	up	-211
1:145416994-145418172	1:145418355-145420710	Satellite/centr	down	183
1:145418416-145419276	1:145418355-145420710	Satellite/centr	overlap	NA
1:145418416-145419276	1:145416884-145418251	Satellite/centr	up	-165
1:145418416-145419276	1:145420828-145422258	Satellite/centr	down	1552
1:145419539-145420748	1:145418355-145420710	Satellite/centr	overlap	NA
1:145419539-145420748	1:145416884-145418251	Satellite/centr	up	-1288
1:145419539-145420748	1:145420828-145422258	Satellite/centr	down	80
1:145420982-145426996	1:145420828-145422258	Satellite/centr	overlap	NA
1:145420982-145426996	1:145422360-145425733	Satellite/centr	overlap	NA
1:145420982-145426996	1:145425604-145428929	Satellite/centr	overlap	NA
1:145420982-145426996	1:145418355-145420710	Satellite/centr	up	-272
1:145420982-145426996	1:145428734-145430682	Satellite/centr	down	1738
1:145429800-145431643	1:145428734-145430682	Satellite/centr	overlap	NA
1:145429800-145431643	1:145430462-145431567	Satellite/centr	overlap	NA
1:145429800-145431643	1:145425604-145428929	Satellite/centr	up	-871
1:145429800-145431643	1:145431672-145432682	Satellite/centr	down	29
1:145431836-145432802	1:145431672-145432682	Satellite/centr	overlap	NA
1:145431836-145432802	1:145432702-145432926	LTR/ERVK	overlap	NA
1:145431836-145432802	1:145430462-145431567	Satellite/centr	up	-269
1:145431836-145432802	1:145433027-145438497	Satellite/centr	down	225
1:145433103-145434147	1:145433027-145438497	Satellite/centr	overlap	NA
1:145433103-145434147	1:145432702-145432926	LTR/ERVK	up	-177
1:145433103-145434147	1:145438606-145439895	Satellite/centr	down	4459
1:145437245-145439928	1:145433027-145438497	Satellite/centr	overlap	NA
1:145437245-145439928	1:145438606-145439895	Satellite/centr	overlap	NA
1:145437245-145439928	1:145439891-145439929	Satellite/centr	overlap	NA
1:145437245-145439928	1:145432702-145432926	LTR/ERVK	up	-4319
1:145437245-145439928	1:145440031-145441466	Satellite/centr	down	103
1:145440006-145442974	1:145440031-145441466	Satellite/centr	overlap	NA
1:145440006-145442974	1:145441569-145442894	Satellite/centr	overlap	NA
1:145440006-145442974	1:145439891-145439929	Satellite/centr	up	-77
1:145440006-145442974	1:145443009-145444494	Satellite/centr	down	35
1:145443117-145448658	1:145443009-145444494	Satellite/centr	overlap	NA
1:145443117-145448658	1:145444595-145450101	Satellite/centr	overlap	NA
1:145443117-145448658	1:145441569-145442894	Satellite/centr	up	-223
1:145443117-145448658	1:145450202-145451291	Satellite/centr	down	1544
1:145448867-145452617	1:145444595-145450101	Satellite/centr	overlap	NA
1:145448867-145452617	1:145450202-145451291	Satellite/centr	overlap	NA
1:145448867-145452617	1:145451398-145452647	Satellite/centr	overlap	NA
1:145448867-145452617	1:145443009-145444494	Satellite/centr	up	-4373
1:145448867-145452617	1:145453326-145453413	SINE/tRNA-Core-RTE	down	709
1:145818827-145819165	1:145818502-145818875	LTR/ERVL	overlap	NA
1:145818827-145819165	1:145818889-145819228	LTR/ERVL	overlap	NA
1:145818827-145819165	1:145818302-145818488	SINE/tRNA-Core-RTE	up	-339
1:145818827-145819165	1:145819249-145819370	LTR/ERVL	down	84
1:146008357-146008729	1:146008028-146008058	Simple_repeat	up	-299
1:146008357-146008729	1:146009471-146009673	SINE/tRNA-Core-RTE	down	742
1:146122315-146122590	1:146120900-146121160	SINE/Core-RTE	up	-1155
1:146122315-146122590	1:146124941-146125351	LINE/L1	down	2351
1:146599592-146600209	1:146599246-146599678	SINE/tRNA	overlap	NA
1:146599592-146600209	1:146598674-146598704	Simple_repeat	up	-888
1:146599592-146600209	1:146600313-146600388	Simple_repeat	down	104
1:146646278-146646579	1:146645698-146646098	LTR/ERV1	up	-180
1:146646278-146646579	1:146646790-146647122	SINE/tRNA	down	211
1:146838967-146839300	1:146838089-146838229	DNA/hAT-Charlie	up	-738
1:146838967-146839300	1:146842906-146843108	SINE/tRNA-Core-RTE	down	3606
1:147301685-147301944	1:147301610-147301764	SINE/tRNA-Core-RTE	overlap	NA
1:147301685-147301944	1:147301780-147302458	LINE/L1	overlap	NA
1:147301685-147301944	1:147301297-147301557	SINE/Core-RTE	up	-128
1:147301685-147301944	1:147302468-147302675	SINE/tRNA-Core-RTE	down	524
1:147331649-147332125	1:147330261-147330448	SINE/tRNA-Core-RTE	up	-1201
1:147331649-147332125	1:147334154-147334184	Simple_repeat	down	2029
1:147358369-147358709	1:147356049-147356670	Simple_repeat	up	-1699
1:147358369-147358709	1:147360445-147360469	Simple_repeat	down	1736
1:149717574-149717890	1:149717465-149717849	LTR/ERV1	overlap	NA
1:149717574-149717890	1:149717427-149717464	Simple_repeat	up	-110
1:149717574-149717890	1:149717900-149717987	SINE/MIR	down	10
1:150470389-150470742	1:150470728-150470925	SINE/tRNA-Core-RTE	overlap	NA
1:150470389-150470742	1:150469486-150469663	SINE/tRNA-Core-RTE	up	-726
1:150470389-150470742	1:150471038-150471386	SINE/tRNA	down	296
1:150548581-150548904	1:150548244-150548482	LINE/L1	up	-99
1:150548581-150548904	1:150549753-150549869	SINE/tRNA	down	849
1:150684873-150685592	1:150684936-150684992	LINE/L2	overlap	NA
1:150684873-150685592	1:150684513-150684726	SINE/tRNA-Core-RTE	up	-147
1:150684873-150685592	1:150686722-150686819	SINE/MIR	down	1130
1:150861867-150862176	1:150861842-150862027	LTR/ERVL-MaLR	overlap	NA
1:150861867-150862176	1:150860887-150861182	LINE/RTE-BovB	up	-685
1:150861867-150862176	1:150862503-150862527	Simple_repeat	down	327
1:151170475-151170827	1:151170254-151170487	DNA/hAT-Charlie	overlap	NA
1:151170475-151170827	1:151170477-151170633	SINE/tRNA	overlap	NA
1:151170475-151170827	1:151169659-151169928	SINE/tRNA	up	-547
1:151170475-151170827	1:151170855-151171028	SINE/MIR	down	28
1:151475561-151475950	1:151475110-151476391	LTR/ERVK	overlap	NA
1:151475561-151475950	1:151474951-151475109	LTR/ERVL-MaLR	up	-452
1:151475561-151475950	1:151476392-151476595	LTR/ERVL-MaLR	down	442
1:151748175-151748627	1:151748343-151748371	Low_complexity	overlap	NA
1:151748175-151748627	1:151747493-151747702	SINE/tRNA	up	-473
1:151748175-151748627	1:151749383-151749751	LINE/RTE-BovB	down	756
1:151837364-151837723	1:151837558-151837684	DNA/hAT-Charlie	overlap	NA
1:151837364-151837723	1:151836396-151836890	LTR/ERV1	up	-474
1:151837364-151837723	1:151838186-151838389	SINE/tRNA-Core-RTE	down	463
1:152401597-152401941	1:152401541-152401557	Simple_repeat	up	-40
1:152401597-152401941	1:152403170-152403200	Simple_repeat	down	1229
1:152683347-152683896	1:152683399-152683577	DNA/hAT?	overlap	NA
1:152683347-152683896	1:152682372-152682499	LINE/RTE-BovB	up	-848
1:152683347-152683896	1:152684986-152685047	SINE/tRNA-Core-RTE	down	1090
1:152795088-152795529	1:152794654-152794824	SINE/tRNA	up	-264
1:152795088-152795529	1:152795797-152795873	SINE/MIR	down	268
1:152868141-152868731	1:152868303-152868354	Simple_repeat	overlap	NA
1:152868141-152868731	1:152868366-152868626	SINE/tRNA	overlap	NA
1:152868141-152868731	1:152867916-152867982	SINE/Core-RTE	up	-159
1:152868141-152868731	1:152868750-152868814	SINE/tRNA-Core-RTE	down	19
1:153204531-153205279	1:153202937-153205316	Satellite/centr	overlap	NA
1:153204531-153205279	1:153202391-153202707	LTR/ERVL-MaLR	up	-1824
1:153204531-153205279	1:153205419-153207608	Satellite/centr	down	140
1:153206979-153207537	1:153205419-153207608	Satellite/centr	overlap	NA
1:153206979-153207537	1:153202937-153205316	Satellite/centr	up	-1663
1:153206979-153207537	1:153207709-153209444	Satellite/centr	down	172
1:153208667-153210449	1:153207709-153209444	Satellite/centr	overlap	NA
1:153208667-153210449	1:153209545-153211565	Satellite/centr	overlap	NA
1:153208667-153210449	1:153205419-153207608	Satellite/centr	up	-1059
1:153208667-153210449	1:153211669-153213158	Satellite/centr	down	1220
1:153210689-153213075	1:153209545-153211565	Satellite/centr	overlap	NA
1:153210689-153213075	1:153211669-153213158	Satellite/centr	overlap	NA
1:153210689-153213075	1:153207709-153209444	Satellite/centr	up	-1245
1:153210689-153213075	1:153213265-153214920	Satellite/centr	down	190
1:153213286-153215957	1:153213265-153214920	Satellite/centr	overlap	NA
1:153213286-153215957	1:153215022-153215637	LTR/ERVK	overlap	NA
1:153213286-153215957	1:153215638-153215677	Simple_repeat	overlap	NA
1:153213286-153215957	1:153215690-153217037	Satellite/centr	overlap	NA
1:153213286-153215957	1:153211669-153213158	Satellite/centr	up	-128
1:153213286-153215957	1:153217138-153217396	LTR/ERVK	down	1181
1:153216259-153219078	1:153215690-153217037	Satellite/centr	overlap	NA
1:153216259-153219078	1:153217138-153217396	LTR/ERVK	overlap	NA
1:153216259-153219078	1:153217396-153218786	Satellite/centr	overlap	NA
1:153216259-153219078	1:153218787-153219088	LTR/ERVK	overlap	NA
1:153216259-153219078	1:153215638-153215677	Simple_repeat	up	-582
1:153216259-153219078	1:153219453-153219577	LINE/L1	down	375
1:153248511-153248936	1:153247819-153248259	LINE/L1	up	-252
1:153248511-153248936	1:153249060-153249142	DNA/TcMar-Tc2	down	124
1:153842873-153843214	1:153842415-153842585	SINE/MIR	up	-288
1:153842873-153843214	1:153843272-153843456	SINE/tRNA-Core-RTE	down	58
1:154114534-154114844	1:154114269-154114619	LINE/L2	overlap	NA
1:154114534-154114844	1:154114640-154115124	LINE/L2	overlap	NA
1:154114534-154114844	1:154114046-154114243	DNA/TcMar-Tigger	up	-291
1:154114534-154114844	1:154115145-154115607	LINE/L1	down	301
1:154374885-154375181	1:154374807-154374913	SINE/MIR	overlap	NA
1:154374885-154375181	1:154374959-154375130	LINE/L2	overlap	NA
1:154374885-154375181	1:154374481-154374643	LINE/L1	up	-242
1:154374885-154375181	1:154375198-154375299	SINE/MIR	down	17
1:154659203-154661185	1:154659194-154660232	Satellite/centr	overlap	NA
1:154659203-154661185	1:154660224-154661190	Satellite/centr	overlap	NA
1:154659203-154661185	1:154657622-154657646	Simple_repeat	up	-1557
1:154659203-154661185	1:154661643-154661709	SINE/tRNA-Core-RTE	down	458
1:155030714-155031053	1:155030994-155031094	LINE/L2	overlap	NA
1:155030714-155031053	1:155030425-155030592	LINE/L1	up	-122
1:155030714-155031053	1:155031121-155031290	SINE/MIR	down	68
1:155087338-155087636	1:155087099-155087442	LINE/RTE-BovB	overlap	NA
1:155087338-155087636	1:155087443-155087511	SINE/tRNA-Core-RTE	overlap	NA
1:155087338-155087636	1:155086373-155086977	LINE/CR1	up	-361
1:155087338-155087636	1:155087650-155088091	DNA/TcMar-Tigger	down	14
1:155205098-155205815	1:155205356-155205384	Simple_repeat	overlap	NA
1:155205098-155205815	1:155205426-155205584	LINE/L1	overlap	NA
1:155205098-155205815	1:155205564-155205869	LINE/L1	overlap	NA
1:155205098-155205815	1:155204582-155204755	SINE/tRNA-Core-RTE	up	-343
1:155205098-155205815	1:155206871-155206963	DNA/TcMar-Tigger	down	1056
1:155610125-155610605	1:155610509-155610700	SINE/tRNA	overlap	NA
1:155610125-155610605	1:155609149-155609187	Low_complexity	up	-938
1:155610125-155610605	1:155610871-155611078	LINE/L2	down	266
1:155875904-155876300	1:155875310-155875804	LINE/L1	up	-100
1:155875904-155876300	1:155876302-155876398	LINE/L2	down	2
1:156283222-156283875	1:156282650-156282721	SINE/tRNA-Core-RTE	up	-501
1:156283222-156283875	1:156284915-156285271	LINE/L1	down	1040
1:156797698-156798017	1:156797514-156798024	LTR/ERVL-MaLR	overlap	NA
1:156797698-156798017	1:156796936-156797255	LTR/ERVL-MaLR	up	-443
1:156797698-156798017	1:156798152-156798244	SINE/MIR	down	135
1:158203493-158203811	1:158203462-158203505	SINE/MIR	overlap	NA
1:158203493-158203811	1:158203283-158203396	SINE/Core-RTE	up	-97
1:158203493-158203811	1:158204084-158204179	LINE/RTE-BovB	down	273
10:33740-34094	10:31118-38290	LTR/ERVK	overlap	NA
10:33740-34094	10:29762-31080	LTR/ERVK	up	-2660
10:33740-34094	10:38291-38562	SINE/Core-RTE	down	4197
10:728520-728902	10:726364-726452	SINE/MIR	up	-2068
10:728520-728902	10:729367-729410	Simple_repeat	down	465
10:835309-835652	10:834870-834990	LINE/L2	up	-319
10:835309-835652	10:836255-836384	SINE/MIR	down	603
10:1111690-1112378	10:1111412-1111729	LINE/L1	overlap	NA
10:1111690-1112378	10:1111074-1111258	LTR/Gypsy?	up	-432
10:1111690-1112378	10:1112847-1112938	LINE/L1	down	469
10:2612353-2612823	10:2612194-2612265	DNA	up	-88
10:2612353-2612823	10:2614316-2614368	SINE/MIR	down	1493
10:3727152-3727426	10:3727111-3727378	LTR/ERVL	overlap	NA
10:3727152-3727426	10:3726690-3726816	LTR/ERVL	up	-336
10:3727152-3727426	10:3728226-3728420	SINE/tRNA-Core-RTE	down	800
10:3771875-3772314	10:3770390-3772423	LINE/L1	overlap	NA
10:3771875-3772314	10:3770287-3770372	LTR/ERVL-MaLR	up	-1503
10:3771875-3772314	10:3772424-3772475	LTR/ERVK	down	110
10:3830613-3830892	10:3830561-3830602	LINE/L2	up	-11
10:3830613-3830892	10:3830913-3831117	SINE/tRNA-Core-RTE	down	21
10:5568283-5568630	10:5568030-5568348	LTR/ERV1	overlap	NA
10:5568283-5568630	10:5567024-5567408	LTR/ERV1	up	-875
10:5568283-5568630	10:5568723-5568881	LINE/L1	down	93
10:5960928-5961176	10:5961005-5961151	SINE/MIR	overlap	NA
10:5960928-5961176	10:5960526-5960676	Simple_repeat	up	-252
10:5960928-5961176	10:5961211-5961310	SINE/MIR	down	35
10:6229042-6229807	10:6228978-6229056	SINE/Core-RTE	overlap	NA
10:6229042-6229807	10:6229125-6229217	SINE/MIR	overlap	NA
10:6229042-6229807	10:6228976-6229038	SINE/tRNA-Core-RTE	up	-4
10:6229042-6229807	10:6230135-6230556	LINE/L1	down	328
10:6377237-6377889	10:6377218-6377462	LINE/L1	overlap	NA
10:6377237-6377889	10:6377464-6377701	LINE/L2	overlap	NA
10:6377237-6377889	10:6377726-6377865	LTR/Gypsy?	overlap	NA
10:6377237-6377889	10:6377031-6377170	SINE/Core-RTE	up	-67
10:6377237-6377889	10:6378026-6378119	DNA/hAT-Charlie	down	137
10:7019484-7019846	10:7018817-7018881	SINE/Core-RTE	up	-603
10:7019484-7019846	10:7020015-7020281	SINE/Core-RTE	down	169
10:7176023-7176549	10:7176151-7176407	LINE/L2	overlap	NA
10:7176023-7176549	10:7176412-7176745	LTR/ERVL	overlap	NA
10:7176023-7176549	10:7175918-7175946	Simple_repeat	up	-77
10:7176023-7176549	10:7176776-7177224	LINE/L2	down	227
10:7854351-7854704	10:7854643-7854758	SINE/tRNA	overlap	NA
10:7854351-7854704	10:7852805-7852935	DNA/hAT-Charlie	up	-1416
10:7854351-7854704	10:7854831-7855029	SINE/tRNA-Core-RTE	down	127
10:8169416-8169695	10:8168589-8168770	SINE/tRNA-Core-RTE	up	-646
10:8169416-8169695	10:8169960-8170009	Simple_repeat	down	265
10:8629717-8630026	10:8629519-8629800	LINE/L1	overlap	NA
10:8629717-8630026	10:8629798-8630100	LINE/L1	overlap	NA
10:8629717-8630026	10:8627944-8629391	LINE/L1	up	-326
10:8629717-8630026	10:8630146-8630348	SINE/tRNA-Core-RTE	down	120
10:9561116-9561722	10:9561319-9561502	SINE/MIR	overlap	NA
10:9561116-9561722	10:9561558-9561747	SINE/tRNA-Core-RTE	overlap	NA
10:9561116-9561722	10:9560776-9560905	SINE/Core-RTE	up	-211
10:9561116-9561722	10:9562058-9562135	LINE/L2	down	336
10:9811984-9812392	10:9812368-9812472	LTR/ERVL-MaLR	overlap	NA
10:9811984-9812392	10:9811206-9811377	LINE/L2	up	-607
10:9811984-9812392	10:9812532-9812728	LINE/L2	down	140
10:10987984-10988628	10:10987470-10987596	SINE/tRNA-Core-RTE	up	-388
10:10987984-10988628	10:10989054-10989117	SINE/MIR	down	426
10:11145862-11146405	10:11145955-11146005	SINE/Core-RTE	overlap	NA
10:11145862-11146405	10:11146014-11146814	LINE/RTE-BovB	overlap	NA
10:11145862-11146405	10:11145091-11145215	LINE/CR1	up	-647
10:11145862-11146405	10:11146815-11146881	SINE/tRNA-Core-RTE	down	410
10:11797451-11797853	10:11797324-11797525	SINE/tRNA-Core-RTE	overlap	NA
10:11797451-11797853	10:11797844-11798039	SINE/tRNA-Core-RTE	overlap	NA
10:11797451-11797853	10:11797050-11797323	LINE/L1	up	-128
10:11797451-11797853	10:11798110-11798175	LINE/L2	down	257
10:12116055-12116610	10:12116379-12116546	SINE/MIR	overlap	NA
10:12116055-12116610	10:12115980-12116007	Simple_repeat	up	-48
10:12116055-12116610	10:12117771-12117994	LINE/L2	down	1161
10:12202467-12203366	10:12202651-12202687	Simple_repeat	overlap	NA
10:12202467-12203366	10:12202942-12203114	SINE/MIR	overlap	NA
10:12202467-12203366	10:12203233-12203447	SINE/tRNA	overlap	NA
10:12202467-12203366	10:12202364-12202456	SINE/MIR	up	-11
10:12202467-12203366	10:12203621-12203742	SINE/tRNA	down	255
10:12626776-12627109	10:12626612-12626873	SINE/tRNA	overlap	NA
10:12626776-12627109	10:12626414-12626532	SINE/tRNA-Core-RTE	up	-244
10:12626776-12627109	10:12627668-12627788	SINE/tRNA	down	559
10:13074616-13075164	10:13074033-13074450	LTR/ERVL	up	-166
10:13074616-13075164	10:13075478-13075565	SINE/tRNA	down	314
10:13102080-13102458	10:13101528-13101828	LTR/ERVL-MaLR	up	-252
10:13102080-13102458	10:13103031-13103485	LINE/L2	down	573
10:13121046-13121745	10:13120742-13120847	LINE/L2	up	-199
10:13121046-13121745	10:13121749-13121885	SINE/MIR	down	4
10:13554210-13555114	10:13554104-13554255	LINE/L2	overlap	NA
10:13554210-13555114	10:13554335-13554491	SINE/MIR	overlap	NA
10:13554210-13555114	10:13554929-13555015	SINE/MIR	overlap	NA
10:13554210-13555114	10:13553960-13554066	SINE/MIR	up	-144
10:13554210-13555114	10:13555373-13555435	SINE/MIR	down	259
10:13713354-13713850	10:13713326-13713480	LTR/ERVL-MaLR	overlap	NA
10:13713354-13713850	10:13713805-13713967	SINE/MIR	overlap	NA
10:13713354-13713850	10:13713156-13713196	SINE/Core-RTE	up	-158
10:13713354-13713850	10:13714007-13714191	LINE/L2	down	157
10:13717099-13717393	10:13717195-13717403	LTR/ERVL	overlap	NA
10:13717099-13717393	10:13716566-13716891	LTR/ERVL-MaLR	up	-208
10:13717099-13717393	10:13717445-13717788	LTR/ERVL	down	52
10:13988752-13989103	10:13988530-13988687	DNA/hAT-Charlie	up	-65
10:13988752-13989103	10:13993041-13994122	LINE/L1	down	3938
10:14866143-14866402	10:14865459-14866686	LINE/L1	overlap	NA
10:14866143-14866402	10:14865192-14865462	LINE/L1	up	-681
10:14866143-14866402	10:14866688-14866977	SINE/tRNA	down	286
10:15032996-15033733	10:15032959-15033252	LINE/L1	overlap	NA
10:15032996-15033733	10:15033638-15033767	SINE/MIR	overlap	NA
10:15032996-15033733	10:15032273-15032415	SINE/MIR	up	-581
10:15032996-15033733	10:15034861-15035102	SINE/Core-RTE	down	1128
10:15284002-15284387	10:15284030-15284075	LINE/L2	overlap	NA
10:15284002-15284387	10:15284076-15284155	SINE/Core-RTE	overlap	NA
10:15284002-15284387	10:15284160-15284552	LINE/RTE-BovB	overlap	NA
10:15284002-15284387	10:15283154-15283268	LINE/L2	up	-734
10:15284002-15284387	10:15284772-15284850	DNA/hAT-Tip100	down	385
10:15373576-15373937	10:15372856-15373233	LTR/ERVL	up	-343
10:15373576-15373937	10:15374203-15374232	Simple_repeat	down	266
10:15674096-15674525	10:15673043-15674601	LINE/RTE-BovB	overlap	NA
10:15674096-15674525	10:15672979-15673042	SINE/tRNA-Core-RTE	up	-1054
10:15674096-15674525	10:15674602-15674672	LTR/ERVK	down	77
10:16153495-16153758	10:16153212-16153421	SINE/tRNA-Core-RTE	up	-74
10:16153495-16153758	10:16153878-16153929	SINE/MIR	down	120
10:16793735-16794066	10:16793776-16793812	Simple_repeat	overlap	NA
10:16793735-16794066	10:16793358-16793479	LTR/ERVL-MaLR	up	-256
10:16793735-16794066	10:16794222-16794370	SINE/tRNA-Core-RTE	down	156
10:16828628-16829176	10:16828653-16828734	SINE/MIR	overlap	NA
10:16828628-16829176	10:16828307-16828515	SINE/tRNA-Core-RTE	up	-113
10:16828628-16829176	10:16830098-16830162	DNA/hAT-Charlie	down	922
10:17141840-17142473	10:17141831-17141989	DNA/hAT-Charlie	overlap	NA
10:17141840-17142473	10:17141615-17141722	DNA/hAT-Charlie	up	-118
10:17141840-17142473	10:17142484-17142571	SINE/MIR	down	11
10:17290752-17291272	10:17290425-17290828	LTR/ERVL-MaLR	overlap	NA
10:17290752-17291272	10:17290889-17291335	LINE/L2	overlap	NA
10:17290752-17291272	10:17290086-17290378	LINE/L1	up	-374
10:17290752-17291272	10:17291670-17292085	LTR/ERVL-MaLR	down	398
10:17318779-17319085	10:17318334-17318553	SINE/tRNA-Core-RTE	up	-226
10:17318779-17319085	10:17319723-17320170	LINE/L2	down	638
10:18588763-18589076	10:18588359-18588588	LTR/ERV1	up	-175
10:18588763-18589076	10:18589353-18589488	SINE/MIR	down	277
10:19001477-19001741	10:19000541-19001089	LINE/L2	up	-388
10:19001477-19001741	10:19002615-19002776	SINE/MIR	down	874
10:19979648-19980095	10:19979615-19979659	Simple_repeat	overlap	NA
10:19979648-19980095	10:19979959-19979990	Simple_repeat	overlap	NA
10:19979648-19980095	10:19979257-19979346	SINE/MIR	up	-302
10:19979648-19980095	10:19981098-19981167	Simple_repeat	down	1003
10:20329001-20329446	10:20328904-20329084	LINE/L2	overlap	NA
10:20329001-20329446	10:20329283-20329434	LINE/L2	overlap	NA
10:20329001-20329446	10:20329435-20329706	SINE/Core-RTE	overlap	NA
10:20329001-20329446	10:20328856-20328888	Simple_repeat	up	-113
10:20329001-20329446	10:20329707-20329787	LINE/L2	down	261
10:20362452-20363124	10:20363046-20363085	Low_complexity	overlap	NA
10:20362452-20363124	10:20362043-20362242	DNA/TcMar-Tigger	up	-210
10:20362452-20363124	10:20363175-20363271	SINE/Core-RTE	down	51
10:20374242-20374636	10:20373419-20374346	LINE/RTE-BovB	overlap	NA
10:20374242-20374636	10:20374348-20374416	SINE/tRNA-Core-RTE	overlap	NA
10:20374242-20374636	10:20372471-20373099	LINE/RTE-BovB	up	-1143
10:20374242-20374636	10:20374865-20375080	SINE/MIR	down	229
10:20429434-20429846	10:20429599-20429665	SINE/tRNA-Core-RTE	overlap	NA
10:20429434-20429846	10:20429667-20430573	LINE/RTE-BovB	overlap	NA
10:20429434-20429846	10:20429117-20429290	SINE/MIR	up	-144
10:20429434-20429846	10:20430605-20430692	SINE/MIR	down	759
10:20599545-20599925	10:20598170-20598347	SINE/MIR	up	-1198
10:20599545-20599925	10:20600989-20601177	SINE/MIR	down	1064
10:20622676-20623542	10:20622716-20622924	SINE/tRNA-Core-RTE	overlap	NA
10:20622676-20623542	10:20622347-20622394	SINE/MIR	up	-282
10:20622676-20623542	10:20623632-20623701	SINE/tRNA-Core-RTE	down	90
10:20637603-20637960	10:20635545-20635600	SINE/MIR	up	-2003
10:20637603-20637960	10:20638038-20638137	SINE/tRNA	down	78
10:20639069-20639359	10:20638311-20638502	DNA/hAT-Charlie	up	-567
10:20639069-20639359	10:20642366-20642407	Simple_repeat	down	3007
10:20787552-20787903	10:20785332-20785507	DNA/hAT-Tip100	up	-2045
10:20787552-20787903	10:20789476-20789635	LINE/L2	down	1573
10:20859471-20859748	10:20857596-20857833	DNA/hAT	up	-1638
10:20859471-20859748	10:20862251-20862288	Simple_repeat	down	2503
10:20873894-20874263	10:20873206-20873398	SINE/MIR	up	-496
10:20873894-20874263	10:20875650-20875833	SINE/tRNA	down	1387
10:21368316-21368586	10:21368047-21368078	Simple_repeat	up	-238
10:21368316-21368586	10:21368761-21368988	SINE/tRNA	down	175
10:21721170-21721479	10:21720841-21721228	LINE/L2	overlap	NA
10:21721170-21721479	10:21721178-21721382	SINE/MIR	overlap	NA
10:21721170-21721479	10:21720645-21720773	SINE/tRNA	up	-397
10:21721170-21721479	10:21721990-21722214	LINE/RTE-BovB	down	511
10:21788742-21789257	10:21785248-21785383	SINE/MIR	up	-3359
10:21788742-21789257	10:21790683-21790950	SINE/Core-RTE	down	1426
10:22525170-22525519	10:22525108-22525178	SINE/MIR	overlap	NA
10:22525170-22525519	10:22525194-22525402	SINE/MIR	overlap	NA
10:22525170-22525519	10:22524854-22525006	SINE/tRNA	up	-164
10:22525170-22525519	10:22526034-22526270	SINE/Core-RTE	down	515
10:22709480-22709870	10:22709402-22709565	LINE/L1	overlap	NA
10:22709480-22709870	10:22709554-22714894	LINE/L1	overlap	NA
10:22709480-22709870	10:22708662-22709261	LINE/L1	up	-219
10:22709480-22709870	10:22714889-22715016	LINE/L1	down	5019
10:22804980-22805333	10:22804922-22804992	SINE/MIR	overlap	NA
10:22804980-22805333	10:22805010-22805223	SINE/MIR	overlap	NA
10:22804980-22805333	10:22804668-22804827	SINE/tRNA	up	-153
10:22804980-22805333	10:22806001-22806060	SINE/tRNA-Core-RTE	down	668
10:22900604-22901060	10:22901042-22901160	SINE/Core-RTE	overlap	NA
10:22900604-22901060	10:22899423-22899656	LTR/ERVL-MaLR	up	-948
10:22900604-22901060	10:22901169-22901549	DNA/hAT-Tip100	down	109
10:23964242-23964598	10:23964357-23964541	SINE/MIR	overlap	NA
10:23964242-23964598	10:23964581-23964651	SINE/MIR	overlap	NA
10:23964242-23964598	10:23963508-23963605	SINE/tRNA-Core-RTE	up	-637
10:23964242-23964598	10:23964753-23964908	SINE/tRNA	down	155
10:24187844-24188537	10:24187774-24188920	LTR/ERVK	overlap	NA
10:24187844-24188537	10:24187716-24187773	Simple_repeat	up	-71
10:24187844-24188537	10:24188921-24190005	LINE/RTE-BovB	down	384
10:24849172-24849538	10:24849127-24849197	SINE/MIR	overlap	NA
10:24849172-24849538	10:24849215-24849404	SINE/MIR	overlap	NA
10:24849172-24849538	10:24848873-24849025	SINE/tRNA	up	-147
10:24849172-24849538	10:24850155-24850252	SINE/tRNA-Core-RTE	down	617
10:26477213-26477652	10:26476374-26476470	Low_complexity	up	-743
10:26477213-26477652	10:26478145-26478235	tRNA	down	493
10:27828820-27829209	10:27829027-27829064	Simple_repeat	overlap	NA
10:27828820-27829209	10:27829158-27829508	LINE/L1	overlap	NA
10:27828820-27829209	10:27828635-27828669	Simple_repeat	up	-151
10:27828820-27829209	10:27829633-27829873	LINE/L1	down	424
10:28335652-28336017	10:28332962-28333081	SINE/MIR	up	-2571
10:28335652-28336017	10:28336365-28336413	Low_complexity	down	348
10:28469330-28472271	10:28468292-28471032	Satellite/centr	overlap	NA
10:28469330-28472271	10:28471136-28472311	Satellite/centr	overlap	NA
10:28469330-28472271	10:28468105-28468171	SINE/tRNA-Core-RTE	up	-1159
10:28469330-28472271	10:28472412-28473519	Satellite/centr	down	141
10:28571433-28571975	10:28571457-28571877	LINE/L2	overlap	NA
10:28571433-28571975	10:28571003-28571052	Simple_repeat	up	-381
10:28571433-28571975	10:28571994-28572079	SINE/tRNA	down	19
10:28620061-28620475	10:28620091-28620178	LINE/L1	overlap	NA
10:28620061-28620475	10:28620249-28620762	LINE/L1	overlap	NA
10:28620061-28620475	10:28619787-28620022	LINE/L1	up	-39
10:28620061-28620475	10:28620764-28620942	LINE/L1	down	289
10:28969523-28969819	10:28969396-28969460	LINE/L2	up	-63
10:28969523-28969819	10:28970096-28970312	DNA/hAT-Charlie	down	277
10:29277897-29278169	10:29277779-29277925	LTR/ERVL-MaLR	overlap	NA
10:29277897-29278169	10:29277526-29277667	LTR/ERVL-MaLR	up	-230
10:29277897-29278169	10:29278312-29278482	SINE/tRNA-Core-RTE	down	143
10:29489251-29489712	10:29489359-29489636	SINE/tRNA	overlap	NA
10:29489251-29489712	10:29488659-29488743	LTR/ERVL	up	-508
10:29489251-29489712	10:29491489-29491706	LINE/L1	down	1777
10:31181678-31182261	10:31180557-31181708	LINE/RTE-BovB	overlap	NA
10:31181678-31182261	10:31181710-31181771	SINE/tRNA-Core-RTE	overlap	NA
10:31181678-31182261	10:31181774-31181913	LINE/RTE-BovB	overlap	NA
10:31181678-31182261	10:31180283-31180546	SINE/Core-RTE	up	-1132
10:31181678-31182261	10:31182544-31183363	LINE/L1	down	283
10:31347003-31347582	10:31346346-31347641	LINE/RTE-BovB	overlap	NA
10:31347003-31347582	10:31346276-31346345	LTR/ERVK	up	-658
10:31347003-31347582	10:31347644-31347710	SINE/tRNA-Core-RTE	down	62
10:31603273-31603656	10:31603231-31603454	LINE/L1	overlap	NA
10:31603273-31603656	10:31603473-31603489	Simple_repeat	overlap	NA
10:31603273-31603656	10:31603525-31604058	LINE/L1	overlap	NA
10:31603273-31603656	10:31602632-31603217	LINE/L1	up	-56
10:31603273-31603656	10:31604058-31604833	LINE/RTE-BovB	down	402
10:31731860-31732126	10:31730863-31731523	LINE/RTE-BovB	up	-337
10:31731860-31732126	10:31733263-31733297	Simple_repeat	down	1137
10:32445471-32445888	10:32445690-32445871	LINE/RTE-BovB	overlap	NA
10:32445471-32445888	10:32445872-32445955	SINE/Core-RTE	overlap	NA
10:32445471-32445888	10:32445337-32445366	Simple_repeat	up	-105
10:32445471-32445888	10:32446085-32446276	DNA/TcMar-Tigger	down	197
10:33526437-33527223	10:33526889-33527031	DNA/hAT-Charlie	overlap	NA
10:33526437-33527223	10:33525592-33526375	LTR/ERVL	up	-62
10:33526437-33527223	10:33527447-33527509	Low_complexity	down	224
10:34757643-34758302	10:34757589-34757655	SINE/tRNA-Core-RTE	overlap	NA
10:34757643-34758302	10:34757656-34758840	LINE/RTE-BovB	overlap	NA
10:34757643-34758302	10:34757294-34757578	LINE/L1	up	-65
10:34757643-34758302	10:34758837-34760829	LINE/L1	down	535
10:35875914-35876204	10:35874827-35875065	LINE/L2	up	-849
10:35875914-35876204	10:35876265-35876361	DNA/hAT-Charlie	down	61
10:36078573-36078900	10:36077925-36078665	LINE/RTE-BovB	overlap	NA
10:36078573-36078900	10:36077855-36077921	SINE/tRNA-Core-RTE	up	-652
10:36078573-36078900	10:36079313-36079342	Simple_repeat	down	413
10:36436496-36436815	10:36435728-36435932	SINE/tRNA-Core-RTE	up	-564
10:36436496-36436815	10:36438404-36438544	LINE/L1	down	1589
10:36764820-36765134	10:36765005-36765208	SINE/tRNA-Core-RTE	overlap	NA
10:36764820-36765134	10:36764516-36764764	LTR/ERV1	up	-56
10:36764820-36765134	10:36765214-36765622	LTR/ERV1	down	80
10:37105464-37105778	10:37105606-37106040	LTR/ERV1	overlap	NA
10:37105464-37105778	10:37104375-37104643	SINE/Core-RTE	up	-821
10:37105464-37105778	10:37106138-37106290	SINE/Core-RTE	down	360
10:37290309-37290954	10:37289936-37290213	LINE/L2	up	-96
10:37290309-37290954	10:37291559-37291740	LINE/CR1	down	605
10:37381572-37382087	10:37379867-37379940	Simple_repeat	up	-1632
10:37381572-37382087	10:37384159-37384265	SINE/MIR	down	2072
10:37474440-37474735	10:37473865-37473957	DNA/TcMar-Tigger	up	-483
10:37474440-37474735	10:37474922-37475623	LINE/RTE-BovB	down	187
10:38257590-38257976	10:38256897-38257634	LINE/L1	overlap	NA
10:38257590-38257976	10:38257654-38257720	LINE/L1	overlap	NA
10:38257590-38257976	10:38257721-38257940	SINE/tRNA-Core-RTE	overlap	NA
10:38257590-38257976	10:38257941-38258310	LINE/L1	overlap	NA
10:38257590-38257976	10:38256864-38256908	LINE/RTE-BovB	up	-682
10:38257590-38257976	10:38258311-38258525	DNA/hAT-Charlie	down	335
10:38511424-38511760	10:38510888-38511105	SINE/tRNA	up	-319
10:38511424-38511760	10:38513249-38513334	LINE/L1	down	1489
10:38546765-38547095	10:38546784-38546902	SINE/tRNA	overlap	NA
10:38546765-38547095	10:38545546-38545929	LINE/L1	up	-836
10:38546765-38547095	10:38547687-38547756	SINE/MIR	down	592
10:38928409-38929378	10:38928364-38928551	LTR/ERV1	overlap	NA
10:38928409-38929378	10:38928587-38928712	LINE/RTE-BovB	overlap	NA
10:38928409-38929378	10:38927888-38928147	LINE/RTE-BovB	up	-262
10:38928409-38929378	10:38929515-38929731	SINE/tRNA-Core-RTE	down	137
10:39034379-39034634	10:39034289-39034395	LTR/Gypsy	overlap	NA
10:39034379-39034634	10:39033950-39033985	Simple_repeat	up	-394
10:39034379-39034634	10:39034755-39034975	SINE/tRNA-Core-RTE	down	121
10:39688697-39690628	10:39688636-39690572	Satellite/centr	overlap	NA
10:39688697-39690628	10:39690572-39690610	LTR/ERVK	overlap	NA
10:39688697-39690628	10:39688209-39688535	LINE/L1	up	-162
10:39688697-39690628	10:39690737-39690960	SINE/tRNA-Core-RTE	down	109
10:41339417-41339806	10:41338342-41342483	LINE/L1	overlap	NA
10:41339417-41339806	10:41335481-41338241	LINE/L1	up	-1176
10:41339417-41339806	10:41342633-41343448	LTR/ERV1	down	2827
10:42994734-42995169	10:42994585-42994613	Simple_repeat	up	-121
10:42994734-42995169	10:42995350-42995372	Simple_repeat	down	181
10:44557373-44557724	10:44556474-44556915	LINE/L1	up	-458
10:44557373-44557724	10:44557797-44557974	SINE/MIR	down	73
10:45018093-45018538	10:45018169-45018361	SINE/MIR	overlap	NA
10:45018093-45018538	10:45018050-45018068	Simple_repeat	up	-25
10:45018093-45018538	10:45018541-45018718	DNA/hAT-Blackjack	down	3
10:45218427-45218738	10:45218169-45218881	LINE/L1	overlap	NA
10:45218427-45218738	10:45218076-45218165	SINE/tRNA-Core-RTE	up	-262
10:45218427-45218738	10:45218909-45219697	LINE/L1	down	171
10:45523256-45523889	10:45522874-45523270	LINE/L1	overlap	NA
10:45523256-45523889	10:45523271-45523553	SINE/tRNA	overlap	NA
10:45523256-45523889	10:45523554-45523906	LINE/L1	overlap	NA
10:45523256-45523889	10:45522679-45522873	SINE/tRNA-Core-RTE	up	-383
10:45523256-45523889	10:45523910-45523988	LINE/L2	down	21
10:46070817-46071204	10:46070552-46070778	SINE/MIR	up	-39
10:46070817-46071204	10:46071291-46071473	SINE/tRNA-Core-RTE	down	87
10:46153974-46155134	10:46154077-46154255	LINE/CR1	overlap	NA
10:46153974-46155134	10:46154276-46154622	LINE/L2	overlap	NA
10:46153974-46155134	10:46154720-46154768	DNA/hAT-Charlie	overlap	NA
10:46153974-46155134	10:46154769-46155040	SINE/Core-RTE	overlap	NA
10:46153974-46155134	10:46155041-46155181	DNA/hAT-Charlie	overlap	NA
10:46153974-46155134	10:46153634-46153795	SINE/tRNA-Core-RTE	up	-179
10:46153974-46155134	10:46155252-46155400	SINE/MIR	down	118
10:46758243-46758729	10:46757377-46757553	SINE/MIR	up	-690
10:46758243-46758729	10:46759438-46759583	SINE/MIR	down	709
10:46787307-46787641	10:46784133-46784427	SINE/tRNA	up	-2880
10:46787307-46787641	10:46788028-46788098	DNA/hAT-Charlie	down	387
10:46947731-46948505	10:46947734-46947913	DNA/hAT-Charlie	overlap	NA
10:46947731-46948505	10:46947509-46947712	LINE/L1	up	-19
10:46947731-46948505	10:46949611-46949816	SINE/tRNA-Core-RTE	down	1106
10:47109820-47110239	10:47109795-47109856	SINE/tRNA	overlap	NA
10:47109820-47110239	10:47109857-47109940	SINE/tRNA-Core-RTE	overlap	NA
10:47109820-47110239	10:47109560-47109770	SINE/MIR	up	-50
10:47109820-47110239	10:47110689-47110934	LTR/ERVL-MaLR	down	450
10:47120545-47120939	10:47120658-47120729	SINE/MIR	overlap	NA
10:47120545-47120939	10:47119896-47120217	LTR/ERVL-MaLR	up	-328
10:47120545-47120939	10:47121226-47121414	SINE/tRNA-Core-RTE	down	287
10:47435092-47435584	10:47434208-47434418	SINE/MIR	up	-674
10:47435092-47435584	10:47435682-47435761	SINE/tRNA-Core-RTE	down	98
10:47573041-47573353	10:47573187-47573361	DNA/TcMar-Tigger	overlap	NA
10:47573041-47573353	10:47572615-47572980	LINE/L1	up	-61
10:47573041-47573353	10:47573447-47573505	LTR/ERVL-MaLR	down	94
10:49048261-49048780	10:49047692-49047901	SINE/Core-RTE	up	-360
10:49048261-49048780	10:49051822-49051892	LINE/L1	down	3042
10:49443543-49443806	10:49443482-49443510	Low_complexity	up	-33
10:49443543-49443806	10:49444087-49444289	LINE/L1	down	281
10:49984301-49985246	10:49984391-49984549	LTR/ERVK	overlap	NA
10:49984301-49985246	10:49984550-49986721	Satellite/centr	overlap	NA
10:49984301-49985246	10:49983905-49984027	LTR?	up	-274
10:49984301-49985246	10:49987159-49987280	LTR?	down	1913
10:49985490-49986613	10:49984550-49986721	Satellite/centr	overlap	NA
10:49985490-49986613	10:49984391-49984549	LTR/ERVK	up	-941
10:49985490-49986613	10:49987159-49987280	LTR?	down	546
10:50374180-50374502	10:50374148-50374204	DNA/hAT-Blackjack	overlap	NA
10:50374180-50374502	10:50373840-50373860	DNA/hAT-Charlie	up	-320
10:50374180-50374502	10:50374691-50374826	LINE/L2	down	189
10:50379923-50380211	10:50380118-50380329	LINE/L1	overlap	NA
10:50379923-50380211	10:50379703-50379914	LINE/L1	up	-9
10:50379923-50380211	10:50380330-50380577	LINE/CR1	down	119
10:51181810-51182266	10:51181657-51181723	SINE/tRNA-Core-RTE	up	-87
10:51181810-51182266	10:51182631-51182834	SINE/tRNA-Core-RTE	down	365
10:51223701-51224030	10:51223717-51223869	SINE/tRNA	overlap	NA
10:51223701-51224030	10:51224016-51224184	DNA/hAT-Charlie	overlap	NA
10:51223701-51224030	10:51222799-51223357	LINE/L1	up	-344
10:51223701-51224030	10:51225217-51225363	SINE/tRNA	down	1187
10:51813546-51813913	10:51813454-51813598	LINE/L1	overlap	NA
10:51813546-51813913	10:51813757-51813785	SINE/MIR	overlap	NA
10:51813546-51813913	10:51813820-51814136	LINE/L1	overlap	NA
10:51813546-51813913	10:51812499-51812670	DNA/hAT-Charlie	up	-876
10:51813546-51813913	10:51814686-51814893	DNA/hAT-Charlie	down	773
10:51907117-51907532	10:51906866-51907041	SINE/MIR	up	-76
10:51907117-51907532	10:51907704-51907847	LTR/ERVL-MaLR	down	172
10:53590301-53590588	10:53590430-53590745	SINE/tRNA	overlap	NA
10:53590301-53590588	10:53589765-53589860	LINE/L1	up	-441
10:53590301-53590588	10:53590877-53590896	Simple_repeat	down	289
10:53927853-53928546	10:53927028-53928607	LINE/L1	overlap	NA
10:53927853-53928546	10:53924876-53927028	LINE/L1	up	-825
10:53927853-53928546	10:53928654-53928807	LINE/L2	down	108
10:54296503-54297168	10:54296218-54297468	LINE/RTE-BovB	overlap	NA
10:54296503-54297168	10:54296148-54296217	LTR/ERVK	up	-286
10:54296503-54297168	10:54297469-54297535	SINE/tRNA-Core-RTE	down	301
10:55104237-55104790	10:55103803-55104417	LINE/L2	overlap	NA
10:55104237-55104790	10:55104572-55104737	SINE/MIR	overlap	NA
10:55104237-55104790	10:55103401-55103701	LINE/L1	up	-536
10:55104237-55104790	10:55105342-55105608	SINE/Core-RTE	down	552
10:58314495-58314913	10:58314499-58314519	Simple_repeat	overlap	NA
10:58314495-58314913	10:58313889-58314075	LTR/ERV1	up	-420
10:58314495-58314913	10:58315037-58315082	LINE/L2	down	124
10:59405577-59405862	10:59405455-59405605	SINE/MIR	overlap	NA
10:59405577-59405862	10:59405001-59405116	SINE/tRNA	up	-461
10:59405577-59405862	10:59405885-59406348	LINE/RTE-BovB	down	23
10:59481520-59484694	10:59478371-59482427	Satellite/centr	overlap	NA
10:59481520-59484694	10:59482528-59486477	Satellite/centr	overlap	NA
10:59481520-59484694	10:59477989-59478259	SINE/Core-RTE	up	-3261
10:59481520-59484694	10:59486580-59488245	Satellite/centr	down	1886
10:59502968-59503674	10:59502974-59504649	Satellite/centr	overlap	NA
10:59502968-59503674	10:59501512-59502873	Satellite/centr	up	-95
10:59502968-59503674	10:59504751-59509092	Satellite/centr	down	1077
10:59533698-59534398	10:59533662-59536190	Satellite/centr	overlap	NA
10:59533698-59534398	10:59532220-59533561	Satellite/centr	up	-137
10:59533698-59534398	10:59536291-59536552	LINE/CR1	down	1893
10:59709298-59709561	10:59709130-59709817	LTR/ERVL	overlap	NA
10:59709298-59709561	10:59708732-59709127	LINE/L1	up	-171
10:59709298-59709561	10:59709818-59709900	SINE/tRNA	down	257
10:61549712-61550000	10:61549355-61549769	LINE/L2	overlap	NA
10:61549712-61550000	10:61548864-61548917	SINE/tRNA-Core-RTE	up	-795
10:61549712-61550000	10:61550205-61550518	LINE/L2	down	205
10:62139627-62140193	10:62139249-62139453	DNA	up	-174
10:62139627-62140193	10:62141045-62141230	DNA/hAT-Charlie	down	852
10:62212821-62213369	10:62212951-62213147	SINE/tRNA-Core-RTE	overlap	NA
10:62212821-62213369	10:62212259-62212479	SINE/tRNA-Core-RTE	up	-342
10:62212821-62213369	10:62213673-62213741	LTR/ERVL	down	304
10:62291520-62292081	10:62289442-62289694	SINE/Core-RTE	up	-1826
10:62291520-62292081	10:62292487-62292515	Low_complexity	down	406
10:62334598-62335202	10:62331740-62331848	SINE/MIR	up	-2750
10:62334598-62335202	10:62336152-62336195	Simple_repeat	down	950
10:63149453-63150042	10:63149448-63149637	LTR/ERVL	overlap	NA
10:63149453-63150042	10:63148413-63148531	LINE/L1	up	-922
10:63149453-63150042	10:63150446-63150485	Simple_repeat	down	404
10:64186866-64187281	10:64186731-64187107	LINE/L2	overlap	NA
10:64186866-64187281	10:64186346-64186616	SINE/Core-RTE	up	-250
10:64186866-64187281	10:64187353-64187376	Simple_repeat	down	72
10:64234614-64234957	10:64234723-64234915	SINE/tRNA-Core-RTE	overlap	NA
10:64234614-64234957	10:64234943-64235034	Simple_repeat	overlap	NA
10:64234614-64234957	10:64233568-64234412	LINE/L1	up	-202
10:64234614-64234957	10:64236374-64236395	Simple_repeat	down	1417
10:64389020-64389465	10:64388820-64390671	LINE/L1	overlap	NA
10:64389020-64389465	10:64388670-64388820	LINE/L1	up	-200
10:64389020-64389465	10:64390672-64390724	LTR/ERVK	down	1207
10:64833412-64833675	10:64833451-64833536	SINE/MIR	overlap	NA
10:64833412-64833675	10:64831806-64832396	LINE/RTE-BovB	up	-1016
10:64833412-64833675	10:64834509-64835123	LINE/RTE-BovB	down	834
10:65162497-65162906	10:65162133-65162667	LINE/RTE-BovB	overlap	NA
10:65162497-65162906	10:65162668-65162734	SINE/tRNA-Core-RTE	overlap	NA
10:65162497-65162906	10:65161959-65161997	LTR/ERV1	up	-500
10:65162497-65162906	10:65163573-65163899	LTR/ERVL-MaLR	down	667
10:65216585-65217104	10:65216418-65216545	DNA/hAT-Charlie	up	-40
10:65216585-65217104	10:65217130-65217575	LINE/L1	down	26
10:65723481-65723988	10:65723417-65723488	SINE/tRNA-Core-RTE	overlap	NA
10:65723481-65723988	10:65723675-65723955	LINE/L1	overlap	NA
10:65723481-65723988	10:65723140-65723416	LINE/RTE-BovB	up	-65
10:65723481-65723988	10:65724398-65724513	LINE/L1	down	410
10:66439053-66439372	10:66438764-66439219	RC/Helitron	overlap	NA
10:66439053-66439372	10:66438439-66438674	LINE/L2	up	-379
10:66439053-66439372	10:66439564-66439665	LINE/L2	down	192
10:67022406-67022929	10:67021904-67021964	Simple_repeat	up	-442
10:67022406-67022929	10:67023370-67023413	LINE/L2	down	441
10:67645278-67645654	10:67645258-67645748	LTR/ERVL-MaLR	overlap	NA
10:67645278-67645654	10:67645132-67645261	SINE/tRNA-Core-RTE	up	-17
10:67645278-67645654	10:67645804-67645830	LINE/L2	down	150
10:68062768-68063101	10:68062451-68062827	LINE/RTE-BovB	overlap	NA
10:68062768-68063101	10:68062857-68062938	SINE/MIR	overlap	NA
10:68062768-68063101	10:68062388-68062450	SINE/tRNA-Core-RTE	up	-318
10:68062768-68063101	10:68065836-68066197	DNA/TcMar-Mariner	down	2735
10:68527464-68528097	10:68527576-68527613	Simple_repeat	overlap	NA
10:68527464-68528097	10:68528094-68528356	LINE/L2	overlap	NA
10:68527464-68528097	10:68526959-68526988	Simple_repeat	up	-476
10:68527464-68528097	10:68528820-68528913	LINE/L2	down	723
10:68736488-68737284	10:68733779-68737553	Satellite/centr	overlap	NA
10:68736488-68737284	10:68730982-68731156	SINE/MIR	up	-5332
10:68736488-68737284	10:68737654-68739629	Satellite/centr	down	370
10:68741687-68743428	10:68739730-68743955	Satellite/centr	overlap	NA
10:68741687-68743428	10:68737654-68739629	Satellite/centr	up	-2058
10:68741687-68743428	10:68745561-68745831	LINE/RTE-BovB	down	2133
10:69332343-69332757	10:69332141-69332770	LTR/ERVL	overlap	NA
10:69332343-69332757	10:69331361-69331477	LINE/L1	up	-866
10:69332343-69332757	10:69334153-69334602	LINE/L2	down	1396
10:70874177-70874771	10:70873545-70874848	LINE/RTE-BovB	overlap	NA
10:70874177-70874771	10:70873478-70873544	SINE/tRNA-Core-RTE	up	-633
10:70874177-70874771	10:70874849-70874923	LTR/ERVK	down	78
10:71059271-71059584	10:71059264-71059636	LINE/L2	overlap	NA
10:71059271-71059584	10:71059099-71059194	LINE/L1	up	-77
10:71059271-71059584	10:71059652-71060011	LINE/RTE-BovB	down	68
10:71989133-71989415	10:71989177-71989347	DNA/hAT-Charlie	overlap	NA
10:71989133-71989415	10:71988603-71988751	DNA/hAT-Charlie	up	-382
10:71989133-71989415	10:71989480-71989687	SINE/tRNA-Core-RTE	down	65
10:72958402-72958991	10:72958333-72958349	Simple_repeat	up	-53
10:72958402-72958991	10:72960337-72960712	LINE/L2	down	1346
10:73214556-73215286	10:73214483-73215778	LINE/RTE-BovB	overlap	NA
10:73214556-73215286	10:73214412-73214482	LTR/ERVK	up	-74
10:73214556-73215286	10:73215779-73215845	SINE/tRNA-Core-RTE	down	493
10:73948473-73949238	10:73948559-73948642	DNA/hAT-Charlie	overlap	NA
10:73948473-73949238	10:73948623-73948773	DNA/hAT-Charlie	overlap	NA
10:73948473-73949238	10:73948859-73948995	SINE/MIR	overlap	NA
10:73948473-73949238	10:73948235-73948440	SINE/tRNA-Core-RTE	up	-33
10:73948473-73949238	10:73949258-73949891	LTR/ERVL	down	20
10:75207458-75207862	10:75207417-75207547	LTR/ERV1	overlap	NA
10:75207458-75207862	10:75207322-75207402	LINE/L1	up	-56
10:75207458-75207862	10:75208019-75208084	SINE/tRNA-Core-RTE	down	157
10:76438389-76438777	10:76438283-76439499	LINE/L2	overlap	NA
10:76438389-76438777	10:76438089-76438254	LINE/L2	up	-135
10:76438389-76438777	10:76439798-76440058	LINE/L2	down	1021
10:76874640-76875122	10:76874777-76876173	DNA/hAT-Charlie	overlap	NA
10:76874640-76875122	10:76874069-76874341	SINE/Core-RTE	up	-299
10:76874640-76875122	10:76877350-76877594	SINE/tRNA	down	2228
10:77204641-77205124	10:77204803-77204941	SINE/MIR	overlap	NA
10:77204641-77205124	10:77204164-77204261	SINE/tRNA-Core-RTE	up	-380
10:77204641-77205124	10:77205269-77205444	SINE/MIR	down	145
10:77433956-77434249	10:77433185-77433989	LINE/RTE-BovB	overlap	NA
10:77433956-77434249	10:77433986-77434048	LINE/RTE-BovB	overlap	NA
10:77433956-77434249	10:77434066-77434241	LINE/L2	overlap	NA
10:77433956-77434249	10:77433120-77433184	SINE/tRNA-Core-RTE	up	-772
10:77433956-77434249	10:77434783-77434959	LINE/RTE-BovB	down	534
10:78188753-78189051	10:78188951-78189395	LTR/ERVL	overlap	NA
10:78188753-78189051	10:78188493-78188526	Low_complexity	up	-227
10:78188753-78189051	10:78189401-78189539	LTR/ERVL-MaLR	down	350
10:78463003-78463319	10:78463070-78463160	SINE/MIR	overlap	NA
10:78463003-78463319	10:78462792-78462983	SINE/tRNA	up	-20
10:78463003-78463319	10:78464511-78464583	Simple_repeat	down	1192
10:80007623-80008811	10:80007173-80007641	LINE/RTE-BovB	overlap	NA
10:80007623-80008811	10:80007748-80008724	Satellite/centr	overlap	NA
10:80007623-80008811	10:80006884-80007155	SINE/Core-RTE	up	-468
10:80007623-80008811	10:80008825-80009449	LINE/RTE-BovB	down	14
10:80222946-80224156	10:80222886-80223062	LINE/L1	overlap	NA
10:80222946-80224156	10:80223959-80224081	LINE/L1	overlap	NA
10:80222946-80224156	10:80224129-80224226	SINE/MIR	overlap	NA
10:80222946-80224156	10:80222004-80222305	SINE/tRNA	up	-641
10:80222946-80224156	10:80224251-80224509	LINE/L1	down	95
10:80516264-80516718	10:80515916-80515952	Simple_repeat	up	-312
10:80516264-80516718	10:80516881-80516990	DNA/hAT-Blackjack	down	163
10:80624801-80625435	10:80625107-80625214	SINE/tRNA	overlap	NA
10:80624801-80625435	10:80622328-80622551	DNA/hAT-Charlie	up	-2250
10:80624801-80625435	10:80625437-80625546	LINE/L1	down	2
10:80758706-80759084	10:80758981-80759055	SINE/MIR	overlap	NA
10:80758706-80759084	10:80759056-80759167	SINE/5S-Deu-L2	overlap	NA
10:80758706-80759084	10:80758456-80758693	SINE/Core-RTE	up	-13
10:80758706-80759084	10:80760046-80760256	Simple_repeat	down	962
10:81055411-81055766	10:81055585-81055707	LTR	overlap	NA
10:81055411-81055766	10:81053686-81053810	SINE/tRNA-Core-RTE	up	-1601
10:81055411-81055766	10:81055809-81055852	SINE/tRNA	down	43
10:81068842-81069147	10:81068896-81068994	LINE/L2	overlap	NA
10:81068842-81069147	10:81068467-81068723	SINE/tRNA	up	-119
10:81068842-81069147	10:81069389-81069534	SINE/tRNA	down	242
10:82018157-82018568	10:82017932-82018135	SINE/tRNA-Core-RTE	up	-22
10:82018157-82018568	10:82019374-82019571	DNA/hAT-Charlie	down	806
10:82688335-82688947	10:82688205-82688503	LINE/L1	overlap	NA
10:82688335-82688947	10:82688562-82688630	DNA/hAT	overlap	NA
10:82688335-82688947	10:82688650-82688739	DNA/hAT-Tip100	overlap	NA
10:82688335-82688947	10:82688051-82688087	Simple_repeat	up	-248
10:82688335-82688947	10:82689627-82689770	SINE/tRNA-Core-RTE	down	680
10:83936234-83936907	10:83935543-83936674	LINE/L2	overlap	NA
10:83936234-83936907	10:83936692-83937262	LINE/L2	overlap	NA
10:83936234-83936907	10:83935415-83935540	SINE/Core-RTE	up	-694
10:83936234-83936907	10:83938522-83938718	LINE/L1	down	1615
10:84493420-84493787	10:84491544-84491611	SINE/tRNA-Core-RTE	up	-1809
10:84493420-84493787	10:84494245-84494295	Low_complexity	down	458
10:84582428-84582721	10:84581147-84581327	SINE/tRNA	up	-1101
10:84582428-84582721	10:84583067-84583262	SINE/tRNA-Core-RTE	down	346
10:84876019-84876514	10:84874836-84875209	LINE/L1	up	-810
10:84876019-84876514	10:84877395-84877577	DNA/hAT-Charlie	down	881
10:86104759-86105154	10:86104328-86104434	LTR/ERVL	up	-325
10:86104759-86105154	10:86105868-86105887	Simple_repeat	down	714
10:86116347-86116729	10:86116547-86117063	LTR/ERVL-MaLR	overlap	NA
10:86116347-86116729	10:86115864-86116022	LINE/CR1	up	-325
10:86116347-86116729	10:86117163-86117453	LINE/L2	down	434
10:86291274-86291696	10:86291239-86291298	LINE/L2	overlap	NA
10:86291274-86291696	10:86290582-86290829	SINE/tRNA-Core-RTE	up	-445
10:86291274-86291696	10:86291774-86292082	LINE/L2	down	78
10:86951111-86951492	10:86951161-86951235	DNA/hAT-Ac	overlap	NA
10:86951111-86951492	10:86951276-86951318	Simple_repeat	overlap	NA
10:86951111-86951492	10:86950078-86950267	SINE/tRNA	up	-844
10:86951111-86951492	10:86952207-86952441	DNA/TcMar-Tigger	down	715
10:86989754-86990050	10:86989561-86989669	DNA/hAT-Tip100	up	-85
10:86989754-86990050	10:86990481-86990700	SINE/MIR	down	431
10:87372799-87373146	10:87372691-87373049	LTR/ERVL	overlap	NA
10:87372799-87373146	10:87373080-87373227	LTR/ERVL	overlap	NA
10:87372799-87373146	10:87372194-87372377	LTR/ERVL-MaLR	up	-422
10:87372799-87373146	10:87373228-87373258	Simple_repeat	down	82
10:87687796-87688186	10:87687611-87687896	LINE/RTE-BovB	overlap	NA
10:87687796-87688186	10:87687897-87687969	SINE/Core-RTE	overlap	NA
10:87687796-87688186	10:87687970-87688110	SINE/MIR	overlap	NA
10:87687796-87688186	10:87688133-87688327	SINE/tRNA-Core-RTE	overlap	NA
10:87687796-87688186	10:87687100-87687323	LINE/L1	up	-473
10:87687796-87688186	10:87688372-87688457	LINE/RTE-BovB	down	186
10:87892711-87893524	10:87892270-87892651	LTR/ERVL?	up	-60
10:87892711-87893524	10:87893884-87893912	Simple_repeat	down	360
10:87941925-87942277	10:87941946-87942285	SINE/tRNA	overlap	NA
10:87941925-87942277	10:87941746-87941912	SINE/tRNA	up	-13
10:87941925-87942277	10:87942429-87942694	DNA/hAT-Charlie	down	152
10:88256793-88257147	10:88255920-88255991	SINE/MIR	up	-802
10:88256793-88257147	10:88257255-88257335	LINE/L2	down	108
10:88365542-88366089	10:88365912-88366056	SINE/tRNA	overlap	NA
10:88365542-88366089	10:88365421-88365484	DNA/hAT-Blackjack	up	-58
10:88365542-88366089	10:88366476-88366638	SINE/tRNA	down	387
10:88442203-88442583	10:88441460-88442000	LTR/ERV1	up	-203
10:88442203-88442583	10:88443447-88443709	LINE/L1	down	864
10:88808292-88808729	10:88807053-88807601	LINE/RTE-BovB	up	-691
10:88808292-88808729	10:88808744-88808939	SINE/MIR	down	15
10:89201234-89201735	10:89201146-89201210	SINE/Core-RTE	up	-24
10:89201234-89201735	10:89201848-89202105	SINE/Core-RTE	down	113
10:89319924-89320252	10:89320105-89320168	LTR	overlap	NA
10:89319924-89320252	10:89320236-89320542	LINE/L2	overlap	NA
10:89319924-89320252	10:89319474-89319694	SINE/tRNA-Core-RTE	up	-230
10:89319924-89320252	10:89320644-89320911	LINE/L1	down	392
10:89454529-89455287	10:89454517-89454713	LINE/L2	overlap	NA
10:89454529-89455287	10:89454866-89455442	LINE/L1	overlap	NA
10:89454529-89455287	10:89453557-89453718	SINE/MIR	up	-811
10:89454529-89455287	10:89455444-89455779	LINE/L1	down	157
10:89544628-89545024	10:89544164-89544203	Simple_repeat	up	-425
10:89544628-89545024	10:89545172-89545331	DNA/hAT-Charlie	down	148
10:90350137-90350581	10:90350541-90350614	SINE/MIR	overlap	NA
10:90350137-90350581	10:90347964-90348187	LINE/L2	up	-1950
10:90350137-90350581	10:90350894-90351095	SINE/tRNA-Core-RTE	down	313
10:90625129-90626460	10:90625124-90626453	Satellite/centr	overlap	NA
10:90625129-90626460	10:90624909-90625023	SINE/tRNA-Core-RTE	up	-106
10:90625129-90626460	10:90629772-90629949	SINE/MIR	down	3312
10:90873999-90874340	10:90874164-90874395	SINE/MIR	overlap	NA
10:90873999-90874340	10:90873625-90873782	LINE/L1	up	-217
10:90873999-90874340	10:90874961-90875020	Unknown	down	621
10:91843119-91843736	10:91843018-91843123	LTR/ERV1	overlap	NA
10:91843119-91843736	10:91843155-91843359	SINE/MIR	overlap	NA
10:91843119-91843736	10:91843379-91843711	LTR/ERVL	overlap	NA
10:91843119-91843736	10:91842764-91843017	LINE/RTE-BovB	up	-102
10:91843119-91843736	10:91844896-91845164	LINE/L1	down	1160
10:92512781-92513144	10:92512955-92513162	SINE/MIR	overlap	NA
10:92512781-92513144	10:92512695-92512761	SINE/tRNA-Core-RTE	up	-20
10:92512781-92513144	10:92516938-92516962	Simple_repeat	down	3794
10:93224076-93224514	10:93223964-93224805	LINE/RTE-BovB	overlap	NA
10:93224076-93224514	10:93223429-93223567	LINE/L2	up	-509
10:93224076-93224514	10:93224807-93224872	SINE/tRNA-Core-RTE	down	293
10:93836900-93837188	10:93836899-93837382	LINE/L1	overlap	NA
10:93836900-93837188	10:93836676-93836832	SINE/MIR	up	-68
10:93836900-93837188	10:93837514-93837549	Simple_repeat	down	326
10:94826886-94827362	10:94826441-94827524	LTR/ERVK	overlap	NA
10:94826886-94827362	10:94826193-94826406	LINE/RTE-BovB	up	-480
10:94826886-94827362	10:94827810-94828068	LINE/RTE-BovB	down	448
10:97286342-97286641	10:97286604-97286729	DNA/hAT-Tip100	overlap	NA
10:97286342-97286641	10:97286037-97286059	Simple_repeat	up	-283
10:97286342-97286641	10:97288619-97288891	SINE/Core-RTE	down	1978
10:100664866-100665408	10:100664575-100664868	LTR/ERVL	overlap	NA
10:100664866-100665408	10:100663886-100664263	LINE/L1	up	-603
10:100664866-100665408	10:100665471-100665654	LTR/ERV1?	down	63
10:102098633-102098926	10:102098527-102098679	DNA/TcMar-Tigger	overlap	NA
10:102098633-102098926	10:102098377-102098524	DNA/TcMar-Tigger	up	-109
10:102098633-102098926	10:102099569-102099723	SINE/MIR	down	643
10:102185994-102186334	10:102183680-102183824	SINE/tRNA-Core-RTE	up	-2170
10:102185994-102186334	10:102188092-102188165	SINE/tRNA	down	1758
10:102585064-102585332	10:102585066-102585452	LINE/L2	overlap	NA
10:102585064-102585332	10:102584614-102585059	LTR/ERVL-MaLR	up	-5
10:102585064-102585332	10:102585442-102585671	LINE/L2	down	110
10:102808298-102808579	10:102808255-102808330	LINE/L1	overlap	NA
10:102808298-102808579	10:102807936-102807982	Simple_repeat	up	-316
10:102808298-102808579	10:102809726-102809800	LINE/L1	down	1147
10:102994009-102994468	10:102994077-102994146	SINE/tRNA-Core-RTE	overlap	NA
10:102994009-102994468	10:102994329-102994503	LINE/L1	overlap	NA
10:102994009-102994468	10:102993321-102993620	LTR/ERVL-MaLR	up	-389
10:102994009-102994468	10:102994868-102995081	SINE/tRNA-Core-RTE	down	400
10:103004764-103005038	10:103002965-103003024	DNA	up	-1740
10:103004764-103005038	10:103005129-103005328	SINE/tRNA-Core-RTE	down	91
10:103164446-103164713	10:103164533-103164579	Simple_repeat	overlap	NA
10:103164446-103164713	10:103164248-103164315	DNA/hAT-Charlie	up	-131
10:103164446-103164713	10:103165703-103165769	DNA/TcMar-Tigger	down	990
10:103273765-103274095	10:103273718-103273870	Simple_repeat	overlap	NA
10:103273765-103274095	10:103273881-103273907	Simple_repeat	overlap	NA
10:103273765-103274095	10:103272332-103272398	SINE/tRNA-Core-RTE	up	-1367
10:103273765-103274095	10:103275154-103276377	LINE/RTE-BovB	down	1059
10:103456328-103456588	10:103456220-103456293	LINE/L1	up	-35
10:103456328-103456588	10:103456625-103456684	LINE/RTE-BovB	down	37
10:103482391-103482723	10:103481475-103481516	Simple_repeat	up	-875
10:103482391-103482723	10:103482892-103482964	Simple_repeat	down	169
10:104202724-104203082	10:104202417-104202491	LINE/L1	up	-233
10:104202724-104203082	10:104203563-104203880	LINE/L2	down	481
11:520259-520643	11:519881-520981	LTR/ERVK	overlap	NA
11:520259-520643	11:519494-519880	LINE/RTE-BovB	up	-379
11:520259-520643	11:520992-521116	LINE/RTE-BovB	down	349
11:629691-630041	11:629319-629589	LINE/L1	up	-102
11:629691-630041	11:631578-631692	LINE/L1	down	1537
11:674862-675157	11:674148-674269	SINE/tRNA	up	-593
11:674862-675157	11:675532-675828	LTR/ERVL-MaLR	down	375
11:794549-795015	11:794374-794517	SINE/tRNA	up	-32
11:794549-795015	11:795160-795312	SINE/tRNA	down	145
11:1297844-1298135	11:1297178-1297498	LINE/L1	up	-346
11:1297844-1298135	11:1298806-1298943	SINE/tRNA-Core-RTE	down	671
11:1876335-1876698	11:1876128-1876205	SINE/Core-RTE	up	-130
11:1876335-1876698	11:1877551-1877581	Low_complexity	down	853
11:1908241-1908737	11:1908595-1908990	LINE/L1	overlap	NA
11:1908241-1908737	11:1907200-1907389	LINE/L1	up	-852
11:1908241-1908737	11:1909065-1909097	LINE/L1	down	328
11:2143221-2143679	11:2142827-2142877	Low_complexity	up	-344
11:2143221-2143679	11:2143765-2143831	SINE/tRNA-Core-RTE	down	86
11:3095034-3095304	11:3094770-3094913	LINE/L2	up	-121
11:3095034-3095304	11:3095514-3095623	LINE/L2	down	210
11:3502012-3502419	11:3501999-3502140	LINE/L2	overlap	NA
11:3502012-3502419	11:3502248-3502450	SINE/MIR	overlap	NA
11:3502012-3502419	11:3501770-3501969	LINE/L2	up	-43
11:3502012-3502419	11:3502531-3502752	LINE/L2	down	112
11:3523999-3524536	11:3523594-3523846	SINE/tRNA	up	-153
11:3523999-3524536	11:3524761-3525031	SINE/tRNA	down	225
11:4125175-4125456	11:4125436-4125555	SINE/tRNA	overlap	NA
11:4125175-4125456	11:4124834-4125010	SINE/tRNA-Core-RTE	up	-165
11:4125175-4125456	11:4125711-4125804	SINE/tRNA-Core-RTE	down	255
11:4149783-4150092	11:4149636-4149843	SINE/tRNA-Core-RTE	overlap	NA
11:4149783-4150092	11:4149578-4149590	Simple_repeat	up	-193
11:4149783-4150092	11:4150137-4150586	LINE/L1	down	45
11:4515051-4515417	11:4514316-4514361	LINE/L2	up	-690
11:4515051-4515417	11:4515746-4515849	SINE/tRNA-Core-RTE	down	329
11:4661948-4662254	11:4661587-4661669	LINE/L1	up	-279
11:4661948-4662254	11:4662418-4662557	LINE/L2	down	164
11:5390738-5391213	11:5390730-5390789	DNA/hAT-Charlie	overlap	NA
11:5390738-5391213	11:5390492-5390688	SINE/tRNA-Core-RTE	up	-50
11:5390738-5391213	11:5391359-5391592	LINE/L1	down	146
11:5415914-5416676	11:5415368-5415872	LINE/L1	up	-42
11:5415914-5416676	11:5416702-5416886	SINE/tRNA-Core-RTE	down	26
11:5502550-5502928	11:5502293-5502633	SINE/tRNA	overlap	NA
11:5502550-5502928	11:5501012-5501368	LINE/L1	up	-1182
11:5502550-5502928	11:5502966-5503109	LINE/L1	down	38
11:5506699-5507085	11:5505455-5505609	SINE/MIR	up	-1090
11:5506699-5507085	11:5507278-5507414	LINE/CR1	down	193
11:6385217-6385518	11:6384927-6384984	LTR/ERVK	up	-233
11:6385217-6385518	11:6385702-6385766	LINE/L2	down	184
11:6473900-6474237	11:6472518-6472792	SINE/tRNA	up	-1108
11:6473900-6474237	11:6474312-6474490	SINE/tRNA	down	75
11:6546505-6546977	11:6546950-6547070	LINE/L2	overlap	NA
11:6546505-6546977	11:6545953-6546339	LINE/RTE-BovB	up	-166
11:6546505-6546977	11:6547329-6547401	SINE/tRNA-Core-RTE	down	352
11:7042252-7042580	11:7042428-7042445	Simple_repeat	overlap	NA
11:7042252-7042580	11:7042446-7042566	SINE/tRNA	overlap	NA
11:7042252-7042580	11:7042567-7042581	Simple_repeat	overlap	NA
11:7042252-7042580	11:7041974-7042180	SINE/tRNA-Core-RTE	up	-72
11:7042252-7042580	11:7042974-7043036	SINE/Core-RTE	down	394
11:8016725-8017346	11:8016546-8016732	LINE/L1	overlap	NA
11:8016725-8017346	11:8017090-8017299	LINE/L1	overlap	NA
11:8016725-8017346	11:8017301-8017401	SINE/tRNA-Core-RTE	overlap	NA
11:8016725-8017346	11:8017320-8017420	SINE/Core-RTE	overlap	NA
11:8016725-8017346	11:8016334-8016539	SINE/tRNA-Core-RTE	up	-186
11:8016725-8017346	11:8017846-8017870	Simple_repeat	down	500
11:8923853-8924233	11:8923619-8923798	SINE/tRNA	up	-55
11:8923853-8924233	11:8924554-8924572	Simple_repeat	down	321
11:9066468-9066739	11:9065435-9065494	LINE/RTE-BovB	up	-974
11:9066468-9066739	11:9067287-9067437	SINE/MIR	down	548
11:9266246-9266525	11:9265190-9265334	SINE/MIR	up	-912
11:9266246-9266525	11:9268231-9268432	SINE/tRNA-Core-RTE	down	1706
11:9887377-9887748	11:9887488-9887658	DNA/hAT-Charlie	overlap	NA
11:9887377-9887748	11:9886935-9887142	SINE/MIR	up	-235
11:9887377-9887748	11:9889218-9889355	SINE/MIR	down	1470
11:10279377-10279781	11:10279358-10279564	DNA/hAT-Charlie	overlap	NA
11:10279377-10279781	11:10279106-10279306	SINE/tRNA-Core-RTE	up	-71
11:10279377-10279781	11:10280218-10280278	SINE/MIR	down	437
11:10821270-10824775	11:10821260-10824937	Satellite/centr	overlap	NA
11:10821270-10824775	11:10819682-10821159	Satellite/centr	up	-111
11:10821270-10824775	11:10825819-10826000	SINE/Core-RTE	down	1044
11:11508560-11508868	11:11506487-11506592	SINE/MIR	up	-1968
11:11508560-11508868	11:11513797-11513814	Simple_repeat	down	4929
11:12514896-12515248	11:12514906-12514964	LINE/RTE-X	overlap	NA
11:12514896-12515248	11:12514567-12514868	LINE/RTE-X	up	-28
11:12514896-12515248	11:12515365-12515725	LINE/RTE-X	down	117
11:12591240-12591870	11:12590739-12591269	LTR/ERVL	overlap	NA
11:12591240-12591870	11:12590591-12590712	SINE/tRNA-Core-RTE	up	-528
11:12591240-12591870	11:12592149-12592324	LTR/ERVL	down	279
11:12773516-12773831	11:12773525-12773586	Simple_repeat	overlap	NA
11:12773516-12773831	11:12772640-12772819	LINE/L2	up	-697
11:12773516-12773831	11:12774531-12774614	Low_complexity	down	700
11:13484804-13485077	11:13484342-13484509	SINE/MIR	up	-295
11:13484804-13485077	11:13485443-13485635	SINE/tRNA-Core-RTE	down	366
11:13867902-13868312	11:13866654-13866801	LINE/L1	up	-1101
11:13867902-13868312	11:13868777-13868869	SINE/MIR	down	465
11:14312023-14313125	11:14312100-14313065	Satellite/centr	overlap	NA
11:14312023-14313125	11:14311856-14311975	SINE/tRNA-Core-RTE	up	-48
11:14312023-14313125	11:14313166-14314091	LINE/RTE-BovB	down	41
11:14334532-14335908	11:14333878-14334906	LINE/L1	overlap	NA
11:14334532-14335908	11:14334911-14334963	LTR/ERVK	overlap	NA
11:14334532-14335908	11:14334966-14335057	LINE/L1	overlap	NA
11:14334532-14335908	11:14335060-14335093	Simple_repeat	overlap	NA
11:14334532-14335908	11:14335874-14336136	SINE/Core-RTE	overlap	NA
11:14334532-14335908	11:14333800-14333866	SINE/tRNA-Core-RTE	up	-666
11:14334532-14335908	11:14336140-14336391	DNA/hAT-Tip100	down	232
11:15434912-15435314	11:15435302-15435504	SINE/MIR	overlap	NA
11:15434912-15435314	11:15434789-15434817	Simple_repeat	up	-95
11:15434912-15435314	11:15435520-15435751	DNA/hAT-Blackjack	down	206
11:16123363-16123802	11:16122883-16122923	Simple_repeat	up	-440
11:16123363-16123802	11:16123907-16123966	SINE/Core-RTE	down	105
11:16766633-16767057	11:16766161-16767403	LINE/RTE-BovB	overlap	NA
11:16766633-16767057	11:16766090-16766160	LTR/ERVK	up	-473
11:16766633-16767057	11:16767423-16767489	SINE/tRNA-Core-RTE	down	366
11:16839943-16840203	11:16839792-16840238	LTR/ERV1	overlap	NA
11:16839943-16840203	11:16836967-16837094	SINE/Core-RTE	up	-2849
11:16839943-16840203	11:16840266-16840391	LINE/L2	down	63
11:18455560-18455859	11:18455335-18455459	SINE/tRNA	up	-101
11:18455560-18455859	11:18456153-18456314	DNA/hAT-Charlie	down	294
11:19103722-19104121	11:19104079-19104221	LTR/ERV1	overlap	NA
11:19103722-19104121	11:19103287-19103579	LTR/ERVL-MaLR	up	-143
11:19103722-19104121	11:19104264-19104594	LTR/ERV1	down	143
11:19674258-19674695	11:19674203-19674272	SINE/tRNA-Core-RTE	overlap	NA
11:19674258-19674695	11:19674275-19674386	LINE/RTE-BovB	overlap	NA
11:19674258-19674695	11:19674121-19674172	SINE/MIR	up	-86
11:19674258-19674695	11:19675161-19675225	SINE/MIR	down	466
11:20708369-20708628	11:20708455-20708500	SINE/tRNA-Core-RTE	overlap	NA
11:20708369-20708628	11:20707975-20708073	LINE/L1	up	-296
11:20708369-20708628	11:20709371-20709570	LINE/L2	down	743
11:21040400-21040746	11:21039397-21039599	SINE/tRNA-Core-RTE	up	-801
11:21040400-21040746	11:21041259-21041302	Simple_repeat	down	513
11:21500790-21501088	11:21500844-21500899	LINE/L2	overlap	NA
11:21500790-21501088	11:21500749-21500777	Simple_repeat	up	-13
11:21500790-21501088	11:21501389-21501585	LTR/ERVL-MaLR	down	301
11:22045119-22045660	11:22044813-22044889	LINE/L2	up	-230
11:22045119-22045660	11:22046314-22046493	DNA/hAT-Charlie	down	654
11:22065303-22065614	11:22064098-22065813	LINE/L2	overlap	NA
11:22065303-22065614	11:22063943-22064092	DNA/TcMar-Tigger	up	-1211
11:22065303-22065614	11:22065950-22066050	LTR/ERVL-MaLR	down	336
11:22550988-22551617	11:22551222-22551238	Simple_repeat	overlap	NA
11:22550988-22551617	11:22550178-22550231	Low_complexity	up	-757
11:22550988-22551617	11:22551783-22551966	SINE/tRNA	down	166
11:25137648-25137985	11:25136832-25137708	LTR/ERVL	overlap	NA
11:25137648-25137985	11:25137745-25137936	LTR/ERVL	overlap	NA
11:25137648-25137985	11:25136758-25136833	LTR/ERVL	up	-815
11:25137648-25137985	11:25138015-25138199	LTR/ERVL	down	30
11:25508152-25508440	11:25506850-25507047	SINE/tRNA-Core-RTE	up	-1105
11:25508152-25508440	11:25508933-25509022	DNA/TcMar-Tigger	down	493
11:25530525-25530934	11:25530114-25530140	Simple_repeat	up	-385
11:25530525-25530934	11:25531122-25531157	Simple_repeat	down	188
11:25557575-25558188	11:25557611-25557689	DNA/hAT-Blackjack	overlap	NA
11:25557575-25558188	11:25557685-25557752	DNA/hAT-Blackjack	overlap	NA
11:25557575-25558188	11:25556941-25557412	LINE/L1	up	-163
11:25557575-25558188	11:25558265-25558324	SINE/MIR	down	77
11:25574523-25574826	11:25574020-25574179	LINE/L2	up	-344
11:25574523-25574826	11:25575008-25575184	DNA/hAT-Charlie	down	182
11:25715100-25715498	11:25715280-25715377	Unknown	overlap	NA
11:25715100-25715498	11:25714781-25715044	SINE/Core-RTE	up	-56
11:25715100-25715498	11:25715597-25716156	LINE/L1	down	99
11:26571957-26572347	11:26571576-26571727	LTR/ERV1	up	-230
11:26571957-26572347	11:26572552-26572759	DNA/hAT-Charlie	down	205
11:27306095-27308595	11:27306178-27306229	Simple_repeat	overlap	NA
11:27306095-27308595	11:27307099-27307197	LINE/RTE-BovB	overlap	NA
11:27306095-27308595	11:27307198-27307264	SINE/tRNA-Core-RTE	overlap	NA
11:27306095-27308595	11:27307529-27307551	Simple_repeat	overlap	NA
11:27306095-27308595	11:27308104-27308202	LINE/RTE-BovB	overlap	NA
11:27306095-27308595	11:27308203-27308269	SINE/tRNA-Core-RTE	overlap	NA
11:27306095-27308595	11:27308540-27308570	Simple_repeat	overlap	NA
11:27306095-27308595	11:27305321-27305399	SINE/MIR	up	-696
11:27306095-27308595	11:27308628-27308720	LTR/ERV1	down	33
11:27902429-27903029	11:27902257-27902357	LINE/L1	up	-72
11:27902429-27903029	11:27903095-27903287	LINE/CR1	down	66
11:28088426-28088979	11:28088644-28088781	SINE/MIR	overlap	NA
11:28088426-28088979	11:28088832-28088977	DNA/hAT-Tip100	overlap	NA
11:28088426-28088979	11:28087263-28087284	Simple_repeat	up	-1142
11:28088426-28088979	11:28088992-28090191	DNA/hAT-Tip100	down	13
11:28657714-28658327	11:28658032-28658120	SINE/MIR	overlap	NA
11:28657714-28658327	11:28656625-28657138	LINE/RTE-BovB	up	-576
11:28657714-28658327	11:28660419-28660437	Simple_repeat	down	2092
11:28841903-28842225	11:28841852-28842009	SINE/MIR	overlap	NA
11:28841903-28842225	11:28841362-28841551	LINE/L2	up	-352
11:28841903-28842225	11:28842320-28842402	SINE/MIR	down	95
11:29234738-29235138	11:29235011-29235447	LTR/ERV1	overlap	NA
11:29234738-29235138	11:29234473-29234726	LTR/ERV1	up	-12
11:29234738-29235138	11:29235483-29235735	LINE/L1	down	345
11:29315266-29315935	11:29315047-29315134	DNA/hAT-Ac	up	-132
11:29315266-29315935	11:29316222-29316355	LINE/L2	down	287
11:29780529-29780822	11:29780397-29780558	SINE/MIR	overlap	NA
11:29780529-29780822	11:29780042-29780077	LINE/CR1	up	-452
11:29780529-29780822	11:29780867-29781077	LINE/L1	down	45
11:29916724-29917106	11:29916753-29916907	SINE/MIR	overlap	NA
11:29916724-29917106	11:29916934-29917041	LINE/L2	overlap	NA
11:29916724-29917106	11:29916579-29916667	LINE/L1	up	-57
11:29916724-29917106	11:29918017-29918200	DNA/hAT-Charlie	down	911
11:30337752-30338142	11:30338124-30338154	Low_complexity	overlap	NA
11:30337752-30338142	11:30337324-30337676	DNA/TcMar-Tigger	up	-76
11:30337752-30338142	11:30338175-30338421	LINE/L1	down	33
11:30965548-30965945	11:30964629-30964822	SINE/tRNA-Core-RTE	up	-726
11:30965548-30965945	11:30966288-30966558	LINE/L2	down	343
11:31754850-31755177	11:31754745-31755246	LINE/RTE-BovB	overlap	NA
11:31754850-31755177	11:31754696-31754761	LINE/L1	up	-89
11:31754850-31755177	11:31755247-31755313	SINE/tRNA-Core-RTE	down	70
11:31786978-31787305	11:31783876-31787054	LINE/L1	overlap	NA
11:31786978-31787305	11:31787096-31787868	LINE/L1	overlap	NA
11:31786978-31787305	11:31783631-31783875	SINE/Core-RTE	up	-3103
11:31786978-31787305	11:31787877-31789196	LTR/ERV1	down	572
11:32315871-32316181	11:32315077-32315164	LINE/L2	up	-707
11:32315871-32316181	11:32316411-32316531	LINE/L2	down	230
11:33076455-33077013	11:33076583-33076649	SINE/tRNA-Core-RTE	overlap	NA
11:33076455-33077013	11:33076895-33077367	LTR/ERVK	overlap	NA
11:33076455-33077013	11:33076277-33076345	SINE/tRNA-Core-RTE	up	-110
11:33076455-33077013	11:33077461-33077551	LINE/L2	down	448
11:33230932-33231554	11:33231482-33231503	Simple_repeat	overlap	NA
11:33230932-33231554	11:33230078-33230095	Simple_repeat	up	-837
11:33230932-33231554	11:33232402-33232433	Simple_repeat	down	848
11:35610538-35610843	11:35610784-35610962	SINE/tRNA-Core-RTE	overlap	NA
11:35610538-35610843	11:35609960-35609989	Simple_repeat	up	-549
11:35610538-35610843	11:35611227-35611270	Simple_repeat	down	384
11:35967421-35967778	11:35967439-35967639	DNA/TcMar-Mariner	overlap	NA
11:35967421-35967778	11:35967732-35967787	SINE/tRNA-Core-RTE	overlap	NA
11:35967421-35967778	11:35966745-35967345	LINE/RTE-BovB	up	-76
11:35967421-35967778	11:35967788-35968338	LINE/RTE-BovB	down	10
11:36612217-36612526	11:36611193-36613845	LTR/ERV1	overlap	NA
11:36612217-36612526	11:36609924-36611188	LTR/ERV1	up	-1029
11:36612217-36612526	11:36613847-36614056	LTR/ERV1	down	1321
11:36961763-36962012	11:36961624-36961988	LTR/ERVL	overlap	NA
11:36961763-36962012	11:36961500-36961621	SINE/tRNA	up	-142
11:36961763-36962012	11:36962175-36962296	LTR/ERVL-MaLR	down	163
11:37155208-37155493	11:37154513-37154605	LINE/RTE-BovB	up	-603
11:37155208-37155493	11:37156179-37156375	SINE/MIR	down	686
11:41470650-41471050	11:41467017-41467230	LINE/L2	up	-3420
11:41470650-41471050	11:41471362-41471409	Simple_repeat	down	312
11:42048290-42048991	11:42047060-42048579	LINE/L1	overlap	NA
11:42048290-42048991	11:42048577-42048864	LINE/RTE-BovB	overlap	NA
11:42048290-42048991	11:42048865-42049323	LINE/RTE-BovB	overlap	NA
11:42048290-42048991	11:42046918-42047065	LINE/RTE-BovB	up	-1225
11:42048290-42048991	11:42049324-42049394	LTR/ERVK	down	333
11:42805388-42805750	11:42805538-42805776	SINE/MIR	overlap	NA
11:42805388-42805750	11:42804742-42804768	Simple_repeat	up	-620
11:42805388-42805750	11:42806224-42806439	LTR/ERVL-MaLR	down	474
11:43874008-43874450	11:43873656-43874754	LINE/RTE-BovB	overlap	NA
11:43874008-43874450	11:43873220-43873583	DNA/hAT-Charlie	up	-425
11:43874008-43874450	11:43874755-43874821	SINE/tRNA-Core-RTE	down	305
11:44083676-44084191	11:44083610-44083955	LINE/L1	overlap	NA
11:44083676-44084191	11:44083956-44084078	SINE/tRNA	overlap	NA
11:44083676-44084191	11:44084079-44084336	LINE/L1	overlap	NA
11:44083676-44084191	11:44083477-44083546	SINE/tRNA-Core-RTE	up	-130
11:44083676-44084191	11:44084389-44084537	LINE/L1	down	198
11:44205936-44206671	11:44205908-44205930	Simple_repeat	up	-6
11:44205936-44206671	11:44207734-44207774	Simple_repeat	down	1063
11:44556629-44556949	11:44556546-44556863	LINE/L1	overlap	NA
11:44556629-44556949	11:44556864-44557070	SINE/tRNA-Core-RTE	overlap	NA
11:44556629-44556949	11:44556077-44556513	LINE/L1	up	-116
11:44556629-44556949	11:44557071-44558742	LINE/L1	down	122
11:44572173-44572498	11:44571832-44571949	SINE/MIR	up	-224
11:44572173-44572498	11:44572512-44573453	LINE/RTE-BovB	down	14
11:44679167-44679657	11:44678459-44678580	LINE/L1	up	-587
11:44679167-44679657	11:44680449-44680642	LINE/L1	down	792
11:44783834-44784200	11:44783512-44783570	Low_complexity	up	-264
11:44783834-44784200	11:44784448-44784493	LINE/CR1	down	248
11:44885624-44885932	11:44885671-44885718	Low_complexity	overlap	NA
11:44885624-44885932	11:44884388-44884439	Simple_repeat	up	-1185
11:44885624-44885932	11:44886192-44886365	DNA/hAT-Charlie	down	260
11:45182622-45183090	11:45182160-45183344	LINE/L1	overlap	NA
11:45182622-45183090	11:45180742-45182159	LINE/L1	up	-463
11:45182622-45183090	11:45183445-45184739	LINE/L1	down	355
11:45539957-45540363	11:45539746-45540377	LINE/L1	overlap	NA
11:45539957-45540363	11:45539545-45539737	LINE/L1	up	-220
11:45539957-45540363	11:45540390-45540413	LINE/L1	down	27
11:45923191-45923644	11:45923257-45923363	LTR/ERVL	overlap	NA
11:45923191-45923644	11:45922890-45923001	DNA/hAT-Charlie	up	-190
11:45923191-45923644	11:45924257-45924459	SINE/tRNA-Core-RTE	down	613
11:46154127-46154391	11:46154069-46154214	LTR/ERVL	overlap	NA
11:46154127-46154391	11:46153534-46153617	LINE/L2	up	-510
11:46154127-46154391	11:46154452-46154562	LTR/ERVL	down	61
11:46261692-46261969	11:46261584-46261645	SINE/MIR	up	-47
11:46261692-46261969	11:46262536-46263068	LINE/L1	down	567
11:46308299-46308854	11:46308045-46308273	SINE/tRNA	up	-26
11:46308299-46308854	11:46309554-46309574	Simple_repeat	down	700
11:46469256-46469613	11:46469129-46469332	SINE/tRNA-Core-RTE	overlap	NA
11:46469256-46469613	11:46469595-46469723	SINE/Core-RTE	overlap	NA
11:46469256-46469613	11:46468959-46469023	LTR/Gypsy	up	-233
11:46469256-46469613	11:46470018-46470188	SINE/tRNA-Core-RTE	down	405
11:46528030-46528505	11:46528387-46528442	SINE/tRNA-Core-RTE	overlap	NA
11:46528030-46528505	11:46527936-46527978	SINE/tRNA-Core-RTE	up	-52
11:46528030-46528505	11:46528617-46529037	LINE/L1	down	112
11:46774411-46774767	11:46774494-46774638	SINE/MIR	overlap	NA
11:46774411-46774767	11:46773688-46774022	LINE/RTE-BovB	up	-389
11:46774411-46774767	11:46775027-46775134	LINE/L2	down	260
11:47367826-47368161	11:47368034-47368331	SINE/tRNA	overlap	NA
11:47367826-47368161	11:47367033-47367100	LINE/L1	up	-726
11:47367826-47368161	11:47368453-47368465	SINE/Core-RTE	down	292
11:47550116-47550531	11:47550117-47550379	SINE/tRNA	overlap	NA
11:47550116-47550531	11:47549805-47549957	Simple_repeat	up	-159
11:47550116-47550531	11:47550562-47550634	SINE/tRNA-Core-RTE	down	31
[truncated: 19,066 more rows]
